RESEARCH ARTICLE

# Endophilin mediated endocytosis and epidermal growth factor receptor govern Japanese encephalitis virus entry and infection in neuronal cells

Puja Sharma<sup>1</sup>, Mukesh Tanwar<sup>1</sup>, Eira Choudhary<sup>1</sup>, Nandhini M. Sundaram<sup>2</sup>, Divya Ojha<sup>1</sup>, Laxmi Mishra<sup>1</sup>, Minu Nain<sup>1a</sup>, Ambadas Rode<sup>1</sup>, Vidya Mangala Prasad<sup>2,3</sup>, Sudhanshu Vrti<sup>1</sup>, Manjula Kalia<sup>1\*</sup>

**1** Regional Centre for Biotechnology, NCR Biotech Science Cluster, Faridabad, India, **2** Molecular Biophysics Unit, Indian Institute of Science, Bengaluru, Karnataka, India, **3** Center for Infectious Diseases Research, Indian Institute of Science, Bengaluru, Karnataka, India

✉ Current address: ICMR-National Institute of Malaria Research, Dwarka, Delhi, India

\* [manjula@rcb.res.in](mailto:manjula@rcb.res.in)

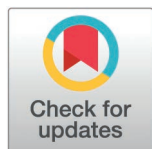

## OPEN ACCESS

**Citation:** Sharma P, Tanwar M, Choudhary E, Sundaram NM, Ojha D, Mishra L, et al. (2025) Endophilin mediated endocytosis and epidermal growth factor receptor govern Japanese encephalitis virus entry and infection in neuronal cells. PLoS Pathog 21(12): e1013790. <https://doi.org/10.1371/journal.ppat.1013790>

**Editor:** Holly Ramage, Thomas Jefferson University - Center City Campus: Thomas Jefferson University, UNITED STATES OF AMERICA

**Received:** May 12, 2025

**Accepted:** December 6, 2025

**Published:** December 16, 2025

**Copyright:** © 2025 Sharma et al. This is an open access article distributed under the terms of the [Creative Commons Attribution License](https://creativecommons.org/licenses/by/4.0/), which permits unrestricted use, distribution, and reproduction in any medium, provided the original author and source are credited.

**Data availability statement:** All relevant data are within the manuscript and its [Supporting Information](#) files.

## Abstract

Several trafficking pathways are operational at the plasma membrane, and both clathrin-dependent, and clathrin-independent endocytosis (CIE), can serve as virus entry portals. Our research has shown that the neurotropic *flavivirus*: Japanese encephalitis virus (JEV), infects neuronal cells via CIE. Here we have identified and characterized two essential host-factors for JEV trafficking in neuronal cells: Endophilin & Epidermal Growth Factor Receptor (EGFR). Through quantitative estimation of viral RNA copy number, we demonstrate that JEV entry in neuronal cells, was blocked by knock-down of Endophilin A isoforms, while activation of Endophilin-mediated endocytosis using a specific inhibitor of GSK-3 $\beta$  enhanced virus entry. Deletion mutants of Endophilin showed an essential role of SH<sub>3</sub>, BAR, H<sub>0</sub> domains for virus entry. High resolution fluorescence imaging of virions showed overlap with Endophilin A2 puncta. Virus entry led to rearrangements of the actin cytoskeleton, and was highly sensitive to any pharmacological actin perturbation. Virus endocytosis activated EGFR, and the specific kinase inhibitors Erlotinib, and Gefitinib, reduced virus entry and replication in cultured cells and mouse primary cortical neurons. Silencing of EGFR, competitive inhibition with receptor ligand EGF, and EGFR specific antibodies significantly impaired JEV binding and entry, indicating the crucial role of its ligand binding domain for virus attachment/receptor interaction. EGFR colocalized with virions at early time-points of infection, and the ED3 domain of the JEV-envelope protein showed specific interaction with EGFR through Bio-layer interferometry (BLI). Our study provides evidence for JEV entry in neuronal cells through an endocytic pathway involving Endophilin and EGFR.

**Funding:** This work was supported by Indian Council of Medical Research (ICMR) grant EMDR/CARE/12-2023-0000176 to MK. The funders had no role in study design, data collection and analysis, decision to publish, or preparation of the manuscript.

**Competing interests:** The authors have declared that no competing interests exist.

## Author summary

A mammalian cell can have multiple entry portals that are defined based on cargo and molecular players such as coat, scission and other accessory proteins. Entry into a permissive cell via endocytosis is a strict requirement for the mosquito-borne *orthoflaviviruses* such as the Japanese encephalitis virus (JEV). This directs the virion into a low pH endosome that enables uncoating of the virus envelope. The primary target of JEV is neuronal cells which can support efficient entry and replication of the virus. In this study we have characterized JEV endocytosis in neuronal cells using molecular and pharmacological perturbations, and high resolution-imaging. We observe that the virus is directed into a clathrin-independent endocytic pathway that is marked by the membrane bending endocytic protein-Endophilin and actin remodeling events. Endophilin depletion and dominant negative mutants block virus uptake, while pharmacological activation of the pathway enhanced virus entry. This pathway was also utilized by the Epidermal growth factor receptor (EGFR), which was also observed to be a crucial host factor for virus binding and entry in cells. This work gives critical insights into the early events of virus entry and can guide future antiviral strategies.

## Introduction

Virus binding and entry into the host cell are the two key early determinants of infection. This involves virus interaction with attachment factors and specific receptors/co-receptors, followed by either fusion at the plasma membrane or endocytosis. Viruses can exploit multiple endocytic pathways and also activate signaling pathways that favour infection [1,2]. Clathrin mediated endocytosis (CME), one of the best studied and characterized pathways in diverse physiological and disease contexts, has also been described as an entry portal for several viruses [3,4]. Over the past two decades, several studies have advanced our understanding of clathrin independent endocytosis (CIE) both in terms of the molecular players and cargoes [5–7]. Not surprisingly, viruses have also been shown to hijack these CIE pathways.

The focus of our study is the mosquito borne *flavivirus*: Japanese encephalitis virus (JEV), which is the leading cause of virus-induced encephalitis in South and Southeast Asia, leading to approximately 50,000–175,000 cases per year. The virus is neurotropic with high morbidity and mortality [8,9]. JEV can infect diverse cell types and mammalian hosts, and several proteins such as Dendritic cell-specific intercellular adhesion molecule-3-grabbing non-integrin (DC-SIGN), Glucose-regulated protein 78 (GRP78), T-cell immunoglobulin and mucin domain 1 (TIM-1), heat shock protein 70, integrins and vimentin have been described as receptor molecules [10–15]. Virus binding is likely to be multivalent, and other potential receptors might also be involved. The entry pathway for JEV is established to be cell-type dependent. Studies from our and other groups have shown that JEV entry in neuronal cells follows CIE [16–19], as opposed to CME in cell types such as fibroblasts and epithelial cells [20–22]. An siRNA-based membrane trafficking screening study

in the human neuronal cell line IMR-32 showed that JEV infection relied majorly on proteins of the actin cytoskeleton: the Actin related protein (ARP)2/3 complex, N-Wiskott-Aldrich syndrome protein family (WASF) family proteins and Rho-GTPases, and on those of the Ephrin-mediated signaling/receptor protein tyrosine kinase (RTK) signaling pathway [17]. Another membrane trafficking screening study in human neuronal cell line SK-N-SH showed an important role of caveolin-1, and the Epidermal growth factor receptor (EGFR)-Phosphoinositide 3-kinase (PI3K) signaling pathway, leading to the activation of RhoA-mediated actin polymerization to be essential for JEV infection [19].

The cell biology of JEV internalization through CIE in neuronal cells is still not completely understood. Recently, a class of BAR domain (Bin, Amphiphysin, Rvs) family proteins have emerged to be essential for CIE pathways. One of the BAR domain family members, endophilin A, was shown to control an endocytic pathway independent of clathrin, named Fast endophilin-mediated endocytosis or FEME [23]. FEME activation is triggered by ligand binding and leads to CIE of several growth factor receptors, such as the G-protein-coupled receptor (GPCR) superfamily and the RTKs [23,24]. Clathrin independent and endophilin mediated endocytosis have been described in neuronal cells including synapses. Major molecular players of FEME, such as dynamin, cholesterol, actin, Rho, Rac and P-21-activated kinase 1 (PAK1), are also involved in JEV entry in neuronal cells [16,17]. JEV is also known to be associated with filopodia, an active site for FEME [16].

Studies have shown that multiple viruses co-opt for activation of PI3K and Mitogen-activated protein kinase (MAPK) signaling pathways downstream of RTKs to gain entry and modulate host defense response [25]. One receptor belonging to this family is the Epidermal growth factor receptor (EGFR), which is well studied in terms of the virus life cycle as an essential host factor. Multiple viruses, such as Influenza A virus, Hepatitis E virus, Hepatitis B virus, and Hepatitis C virus utilize EGFR as an entry co-factor to mediate virus internalization inside the host cell [25,26]. Other viruses exploit this kinase's complex dynamic signaling network by activating downstream signaling cascades such as EGFR/ERK/AKT to gain entry. JEV is known to exploit EGFR-PI3K signaling to activate the F-actin polymerization leading to JEV internalization [19].

This study further delineates the pathway exploited by JEV to gain entry into its target neuronal cells. We observe that endophilin A is a major host factor for JEV entry in human neuronal SH-SY5Y cells. Genetic knockdown of endophilin A isoforms leads to a decrease in virus internalization, while specific activation of the FEME pathway using an inhibitor of Glycogen synthase kinase (GSK)3 $\beta$  enhanced virus entry. Using dominant negative domain mutants of endophilin, the crucial role of membrane curvature sensor domain BAR, and the receptor binding domain SH<sub>3</sub> in JEV entry was established. JEV internalization also led to extensive remodelling of the actin cytoskeleton. Endophilin-mediated endocytosis has also been reported to be crucial for the uptake of many RTKs, such as EGFR. JEV internalization led to the phosphorylation of EGFR, and inhibition of EGFR kinase activity blocked virus entry. Treatment of cells with EGFR extracellular domain binding antibody, cetuximab, and EGF led to a decrease in JEV attachment and internalization, further supporting the hypothesis that EGFR could potentially be involved in the initial binding of JEV with the host cell surface. A specific interaction of the JEV-envelope domain (ED) III with EGFR was confirmed through BLI. Collectively, our study demonstrates the cellular trafficking and signaling pathways exploited by JEV, further deepening the understanding of the molecular pathogenesis of JEV neuronal cell entry, which ultimately will be crucial for developing suitable antiviral therapies.

## Results

### JEV binding, entry and infection in neuronal cells is clathrin-independent

Kinetic analysis of the virus replication cycle in SH-SY5Y cells showed that virus uptake in cells peaks between 30 min–1hour (h) (S1a Fig). Following release from endosomes through a low pH mediated uncoating of the envelope, viral RNA initiates replication on ER-derived membranes and a rapid increase in viral RNA levels is observed in the infected cells (S1a Fig). Virus egress in the extracellular milieu can be detected from 12h post-infection (hpi) (S1b Fig).

JEV endocytosis was analyzed through quantitative estimation of viral RNA copy number at early times of infection using two different assay conditions (Fig 1a). One was a widely used ice-synchronized technique that involves virus

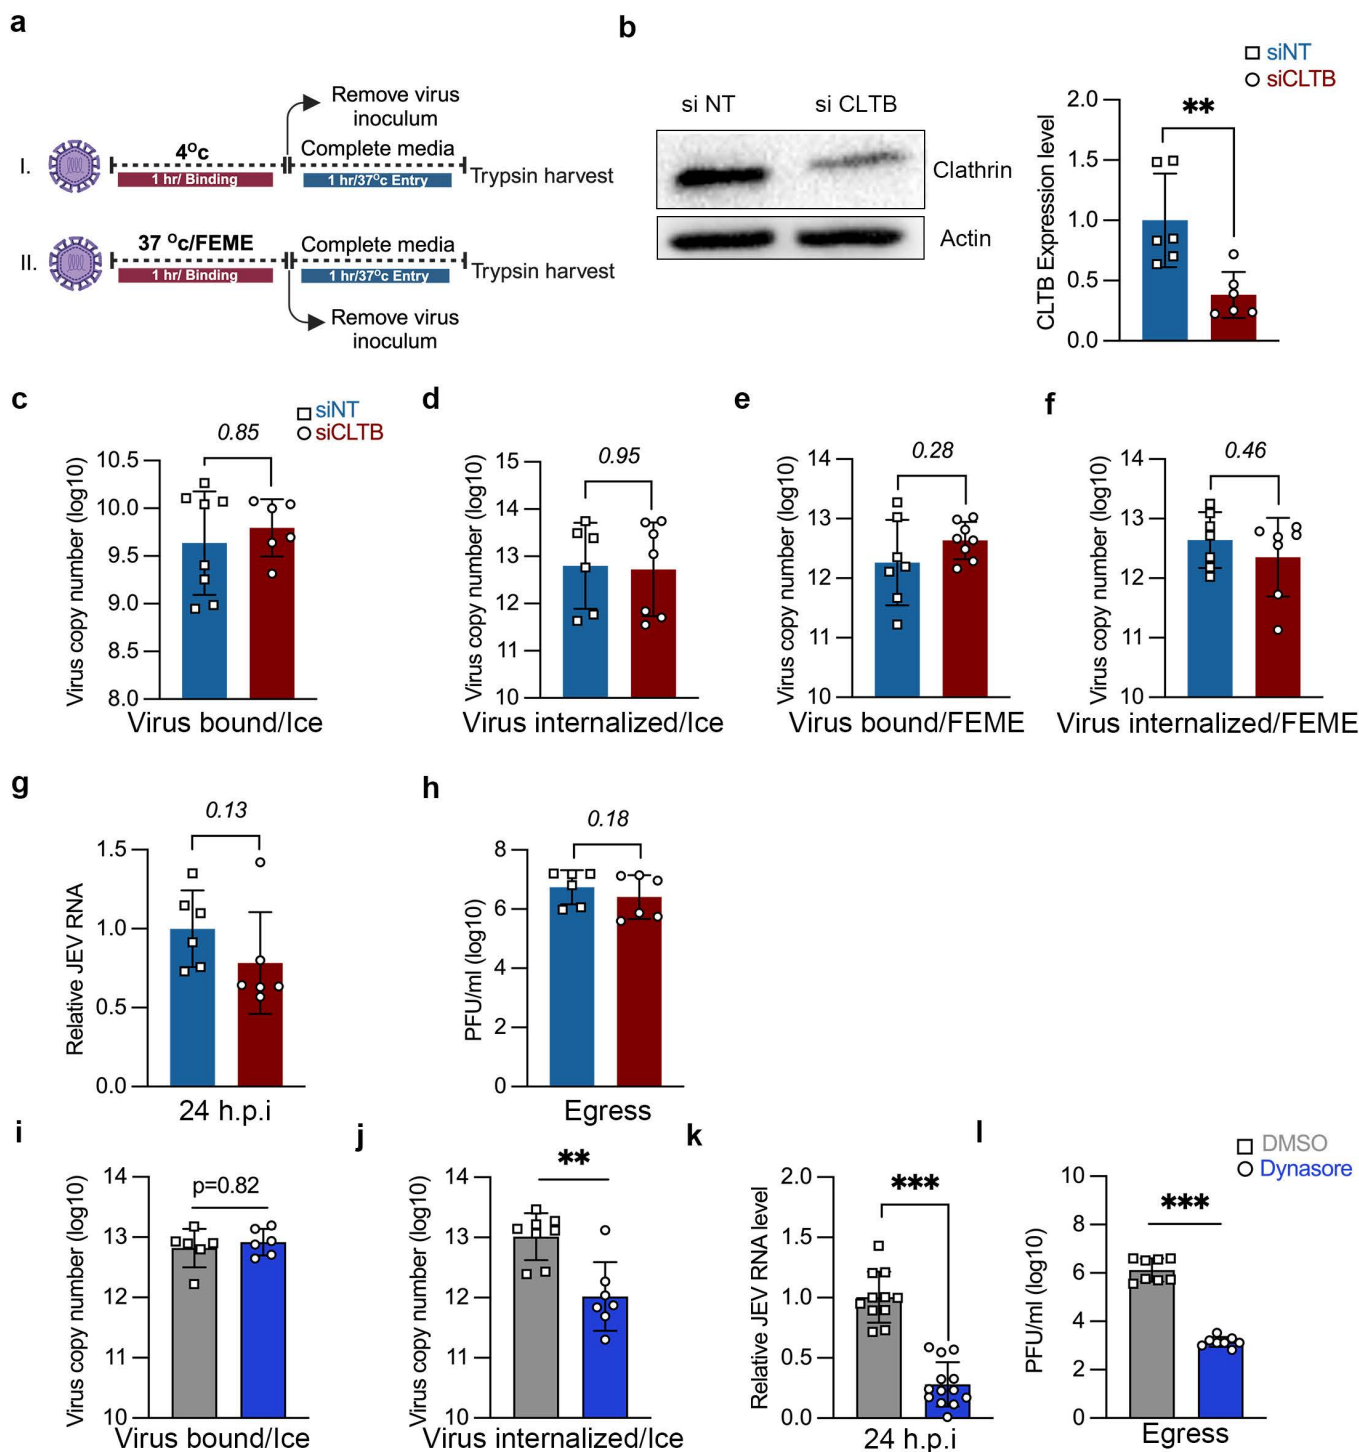

**Fig 1. JEV binding, entry and replication in neuronal cells is clathrin-independent.** (a) Schematic representation of virus binding/entry assay. Created in BioRender. Kalia, M. (2025) <https://BioRender.com/22xa6tp>. (b-h) SH-SY5Y cells were transfected with siNT/si CLTB for 72 h. (b) Western blot shows CLTB protein levels and bar graph shows the relative level of CLC mRNA post-siRNA transfection. (c-f) The siRNA-transfected cells were infected with JEV (5/10 MOI), and virus binding/entry assays were performed as described. Absolute virus envelope copies were detected with qRT-PCR. (g-h) The siRNA-transfected cells were infected with JEV (1 MOI) for 24 h. Intracellular viral RNA levels were determined by qRT-PCR (g), and the extracellular virus particles were detected with plaque assays (h). (i-l) Cells seeded in nu-serum containing media were pre-treated with either DMSO or 80μM

dynasore for 1 h 37°C and were infected with purified JEV as described previously. (i-j) Bound and internalized virus load was estimated by qRT-PCR, when incubated on ice. (k-l) Viral RNA levels and titres at 24 hpi. All values are represented from two or more independent experiments with mean  $\pm$  S.D. Statistical analysis was determined with Mann Whitney test with a 95% confidence level, NEJM: 0.12 (ns), 0.033 (\*), 0.002(\*\*), <0.001(\*\*\*)

<https://doi.org/10.1371/journal.ppat.1013790.g001>

binding to cells on ice for 1 h, followed by washing and further incubation in complete serum medium at 37°C for 1 h. However, since ice incubation has been reported to reduce membrane fluidity and can potentially inhibit fast endocytic processes [23], we also employed an alternate assay where virus binding and entry was performed at 37°C (Fig 1a). MOI 5 (ice-binding) and MOI 10 (physiological conditions) we determined to be ideal for quantitative estimation of viral RNA to analyze virus binding and endocytosis. At these MOIs nearly every cell receives at least one infectious virus particle and enables an accurate measurement of virus endocytosis.

To examine the role of CME in JEV entry in the human neuroblastoma cell line SH-SY5Y, an RNA interference-based knockdown approach was utilized. The effect of Clathrin light chain (CLC) knockdown was first tested on the internalization CME cargo: Transferrin (Tf) and Epidermal growth factor (EGF). While Tf endocytosis is strictly through CME, EGF follows different endocytic routes, with a lower dose resulting in uptake through CME, whereas, at a higher dose, a major fraction of EGF gets internalized through CIE [27,28]. Treatment of SH-SY5Y cells with CLC siRNA resulted in a significant decrease in the protein and transcript levels compared to siNT, indicating efficient knockdown (Fig 1b). These cells were given a pulse of Tf (20 ng/ml) and different concentrations of EGF (10, 20, 50, & 180 ng/ml) for 5 min at 37°C. As expected under conditions of CME inhibition, in comparison to short interfering non-targeting (siNT), the si Clathrin light chain B (CLTB) transfected cells showed a significant decrease in the uptake of Tf (S2a and S2b Fig). The knockdown of CLTB also decreased the internalization of EGF at a concentration range between 10–50 ng/ml, suggesting a role of CME in EGF uptake at these concentrations. However, a higher dose of 180 ng/ml EGF showed no perturbation in uptake, confirming its endocytosis via CIE (S2a and S2b Fig).

After the cargo uptake inhibition was established upon CLTB knockdown conditions, we next checked its effect on JEV endocytosis. In one set of experiments, the virus (5 MOI) was allowed to bind on the cell surface at 4°C (ice) for 1 h, which synchronizes virus binding on cells but prevents internalization. After 1 h of binding, virus entry was initiated by adding complete media and shifting the temperature to 37°C for 1 h. Cells are then harvested following trypsin treatment, which removes the extracellular bound virus particles to enable quantification of internalized viral load only (Fig 1a, upper panel). Virus binding (ice) remained unaltered, indicating that virus attachment is unaffected by CLC depletion (Fig 1c). Virus endocytosis also remained unaltered (Fig 1d).

In a parallel set of experiments, virus (10 MOI) binding was performed at 37°C for 1 h, followed by further incubation in complete medium for 1 h to permit virus entry (Fig 1a, lower panel). These physiological or FEME conditions were also used since ice incubation is known to change membrane fluidity, which can inhibit certain CIE pathways [24]. The virus binding at physiological/FEME conditions showed no significant change (Fig 1e), and further virus internalization under these conditions was also unperturbed (Fig 1f). The depletion of CLTB also had no effect on virus replication as no change in the viral RNA levels was observed at 24 h (Fig 1g), along with unaltered virus titers (Fig 1h). These experiments indicate that JEV internalization in neuronal cells can follow a clathrin-independent pathway.

To test the requirement of dynamin for the endocytosis of JEV in SH-SY5Y cells, Dynasore, a cell-permeable and reversible GTPase inhibitor that inhibits the activity of dynamin was used [29]. Cells were treated with 80  $\mu$ M of dynasore and given a pulse of Tf (20 ng/ml) and EGF (50 ng/ml) for 5 min at 37°C. As expected, dynasore inhibited both EGF and Tf uptake (S2c Fig). To confirm the role of dynamin in JEV endocytosis, virus entry assays was performed in the presence of the dynasore. While there was no difference in virus binding (Fig 1i), nearly ~90% decrease in virus internalization (Fig 1j), and a very significant inhibition of virus replication (~80% reduction in viral RNA levels, and ~99% reduction in virus titers at 24 hpi) were observed compared to DMSO treated cells (Fig 1k–1l). We also checked for the localization of dynamin with capsid labelled virions at early times of infection (S3 Fig). At 10 minutes post-infection (mpi) ~75% of the capsid



puncta overlapped with dynamin ([S3a](#) and [S3b Fig](#)). In agreement with earlier published work from our lab [\[16\]](#), these results demonstrate that JEV entry is dynamin-dependent.

### Endophilin is an essential host-factor for JEV entry and replication

To characterize other molecular players for JEV endocytosis, we tested the role of endophilin. Endophilin A exists in three isoforms: A1/A2/A3. Firstly, we checked the basal protein level expression of all three endophilin A proteins in three different cell types: (1) human neuronal cell line SH-SY5Y, (2) HeLa cell line and (3) mouse brain tissue. As shown earlier [\[24,30\]](#), endophilin A2 expression was ubiquitously observed in all three samples ([Fig 2a](#), left panel). In contrast, endophilin A1 expression was only observed in brain tissue, while there was lower expression of endophilin A3 in SH-SY5Y, compared to HeLa cells and mouse brain ([Fig 2a](#), left panel). We then utilized a genetic knockdown-based approach to establish the effect of endophilin A depletion on the uptake of Tf and EGF. We performed a triple knockdown (TKD) of all three endophilin isoforms, as in the absence of one, the other endophilin A isoforms have been shown to compensate [\[23\]](#). Western blots confirmed efficient knockdown by siTKD transfection ([Fig 2a](#), right panel).

SH-SY5Y cells transfected with siNT or siTKD were subjected to a pulse of EGF and Tf for 5 min at 37°C. Depletion of endophilin led to no substantial reduction in the uptake of Tf ([S4a](#) and [S4b Fig](#)). An earlier study [\[23\]](#) confirmed that endophilin A is not required for Tf uptake through CME. A dose-dependent pulse of the siTKD transfected SH-SY5Y cells with EGF (50 & 180 ng/ml) for 5 min at 37°C showed a reduction in EGF uptake at a higher concentration of 180 ng/ml but had no effect at a concentration of 50 ng/ml. These results indicated that while endophilin TKD did not affect CME, it inhibited the CIE of EGF at higher doses ([S4a](#) and [S4b Fig](#)). As reported earlier [\[23\]](#), siTKD increased the cell surface levels of EGFR ([S4c Fig](#)). The CIE of EGF has also been shown in several independent studies in multiple cell lines such as BSC1, RPE1 and HeLa [\[23,31–33\]](#).

The impact of genetic inactivation of endophilin A (siTKD) was subsequently checked on virus endocytosis with entry experiments performed at two different temperatures, as stated previously ([Fig 1a](#)). The relative mRNA expression of endophilin A2 was checked in siTKD transfected cells in every experiment to confirm the knockdown at 72 h ([Fig 2b](#)). Depletion of endophilin did not affect virus binding on ice ([Fig 2c](#)). Still, it significantly reduced virus entry (~69%), validating endophilin's crucial role in virus internalization ([Fig 2d](#)). We also performed the binding/internalization assays at a physiological temperature of 37°C. Again, in the TKD cells, the virus binding at 37°C remained unaltered ([Fig 2e](#)), while virus internalization showed significant (~75–80%) inhibition across different MOIs ([Figs 2f](#), [S5a](#), and [S5b](#)). These results were also validated to check whether this observed decrease in virus entry would manifest in lower virus replication. Indeed, we observed a substantial decline (~44%) in viral RNA levels ([Fig 2g](#)) and (~28%) virus titers ([Fig 2h](#)) at 24 hpi. These results highlight the crucial role of endophilin in JEV entry and infection.

We next checked for the colocalization of endophilin A2 with virus particles stained with specific capsid antibody, that will be indicative of internalized virions at early times of infection (before initiation of virus replication). While no signal was detected in mock-infected cells, several distinct puncta were visualized in cells where virus was added ([S5c Fig](#)). A quantitative estimation of virus particles showed that ~70 puncta were detected per cell at 10 mpi, a time-point where virus endocytosis is initiated ([S5c](#) and [S5d Fig](#)). We observed colocalization of endophilin A2 with JEV particles (capsid structures) at 10 mpi ([S5c Fig](#)). Spot-spot colocalization analysis of the confocal micrographs showed ~47% of JEV was colocalized with endophilin A2 positive structures ([S5d Fig](#)). Time course analysis showed that while the number of capsid puncta gradually declined by 60 min, the colocalization with endophilin remained high (~60%). These data suggest that the earliest endocytic structures containing internalized JEV particles are also positive for endophilin. We also performed TEM imaging of sectioned SH-SY5Y cells to examine the early entry events of virus infection. Spherical virus particles of ~50 nm were observed on the surface of SH-SY5Y cells, showing interactions in large inundations of the cell membrane that appear distinct from the classical clathrin-coated vesicles ([Fig 2i](#)).

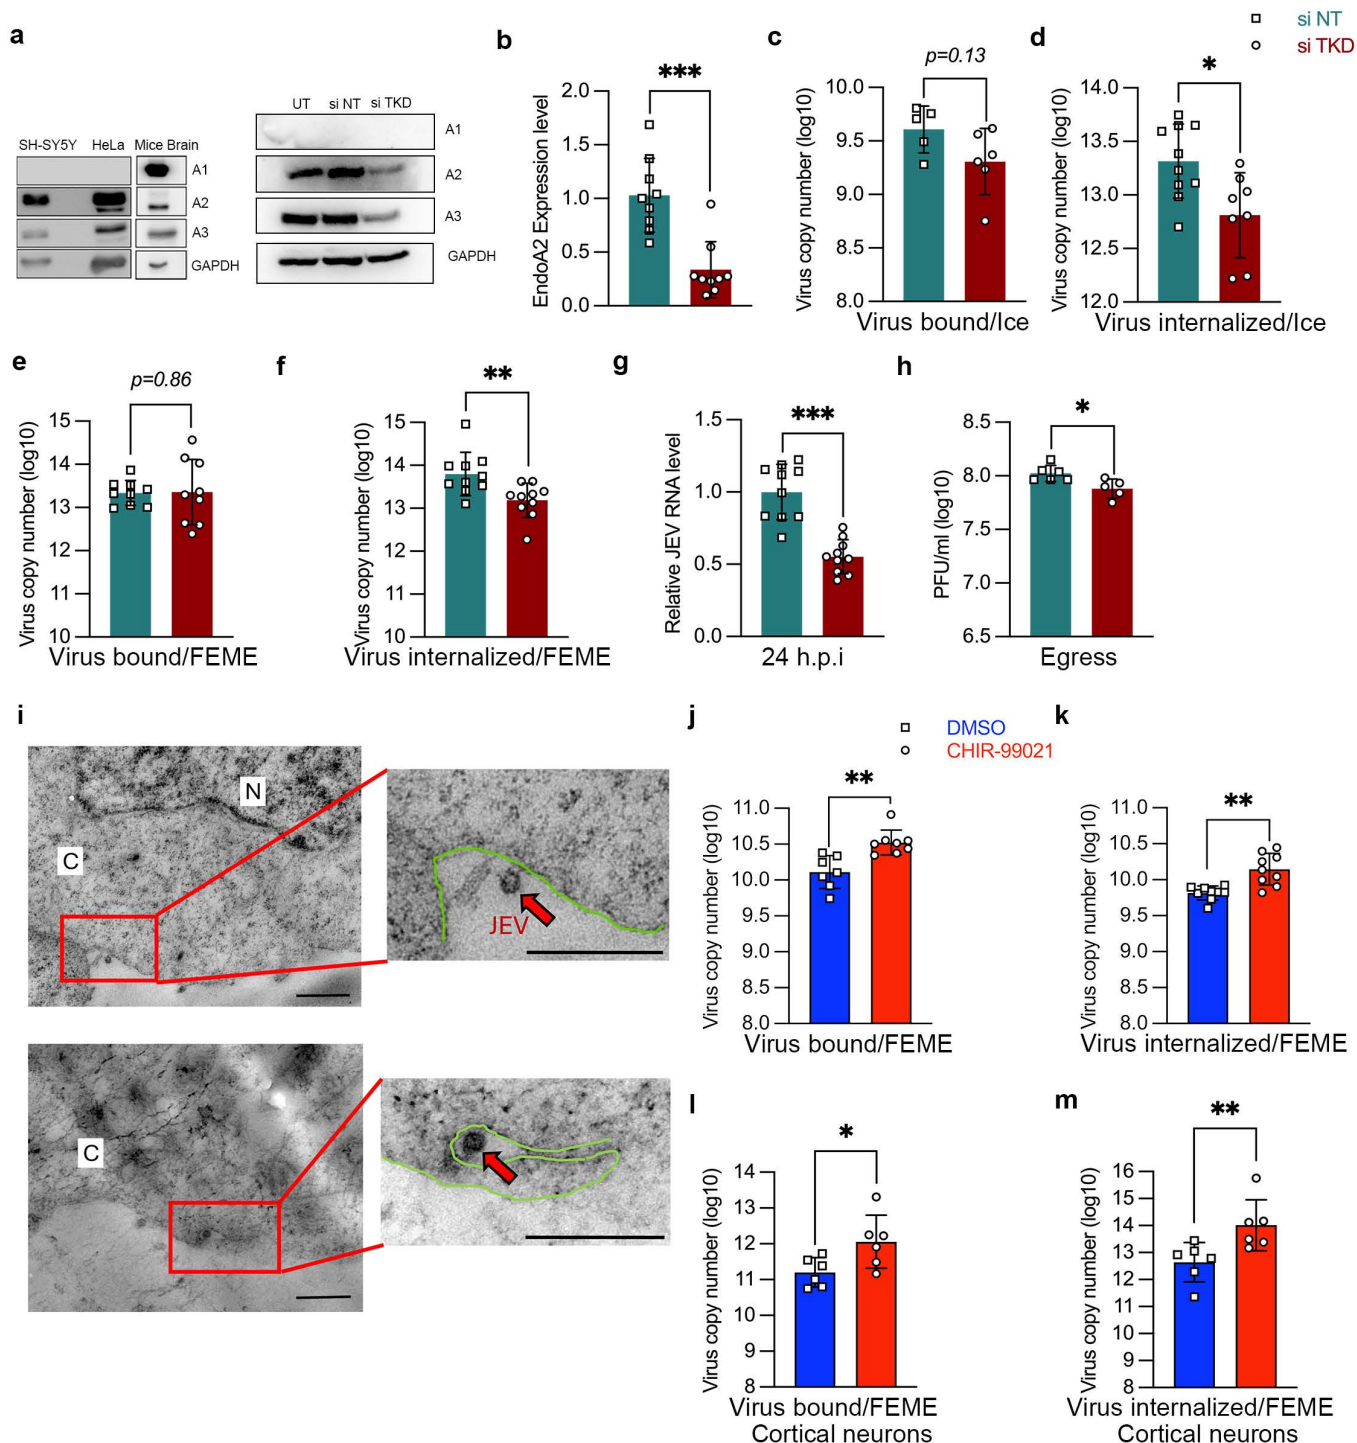

**Fig 2. Endophilin is an essential host-factor for JEV entry and replication.** (a) Protein lysates from SH-SY5Y, HeLa and homogenized mouse brain tissue were immunoblotted with endophilin A1/A2/A3 and GAPDH (internal control), left panel. Right panel shows levels of endophilin A/A2/A3 in untransfected, NT siRNA and siTKD post-transfected SH-SY5Y cells. (b-h) SH-SY5Y cells were transfected with all three endophilin A1/A2/A3 siRNA (siTKD) for 72h. (b) Bar graph shows the relative endophilin A2 levels in siNT/siTKD transfected cells. (c-d) Endophilin siTKD cells were allowed to bind with 10 MOI of virus on ice, and virus binding/internalization assays were performed as described previously. Absolute virus envelope copies were detected with qRT-PCR. (e-f) The siNT and siTKD transfected cells were infected with 10 MOI of the virus at 37°C for 1 h, and virus binding/internalization assays

were performed. Absolute virus envelope copies were detected with qRT-PCR. (g-h) Endophilin siTKD cells were infected with 1 MOI of the virus at 37°C for 1 h and were washed and harvested at 24 hpi, viral RNA was determined by qRT-PCR (g), and the extracellular virus particles were detected with plaque assays (h). (i) Representative room temperature ultramicrotomy cell sections imaged under TEM. Larger cellular sections with zoomed-in insets (red boxes) show spherical JEV particles of ~50 nm (indicated by red arrows) near the cell membrane (marked in green); scale: 500 nm. (j-m) SH-SY5Y cells (j-k), or primary cortical neurons (l-m), were pre-treated with CHIR-99021 for 1 h at 37°C, and then were infected with 10 MOI of JEV at 37°C for 1 h, and virus binding/internalization assays were performed as described. Absolute virus envelope copies were detected with qRT-PCR. Data shown are from two or more independent experiments represented as mean ± S.D. Statistical analysis was determined with Mann Whitney test with 95% confidence level, NEJM: 0.12 (ns), 0.033 (\*), 0.002(\*\*), <0.001(\*\*\*).

<https://doi.org/10.1371/journal.ppat.1013790.g002>

## JEV entry is enhanced by GSK3β inhibition

To further investigate if there are any parallels between endophilin-mediated CIE of JEV and the FEME pathway, we treated SH-SY5Y cells with a small molecule compound CHIR-99021, a well-reported kinase inhibitor of GSK3β, which suppresses FEME under normal physiological conditions [34]. Treatment of cells with CHIR-99021 for 1 h at 37°C enhanced the uptake of EGF, further supporting the observation that inhibition of GSK3β leads to upregulation of FEME (S6a Fig). The effect of this inhibitor was then checked on virus binding/internalization at a physiological temperature of 37°C (FEME conditions). Treating cells with CHIR-99021 led to a significant increase in virus binding and internalization (Fig 2j and 2k). These results suggest that relieving the autoinhibition of FEME by treating cells with inhibitors of kinases that regulate the key steps of the pathway substantially increased JEV endocytosis. These findings were further corroborated in the primary culture of cortical neurons harvested from mice brain, which showed a similar enhancement of JEV entry on the CHIR-99021 treatment (Fig 2l and 2m).

Next, we tested whether JEV endocytosis increases the fluorescence intensity of endophilin-positive structures that are a hallmark of FEME [23,24]. Since serum stimulation has been shown to increase FEME [34], we used it as a positive control along with EGF stimulation. Primary cortical neurons were stimulated with 20% serum for 15 min at 37°C. Compared to the control, serum stimulation increased endophilin-positive structures, which can be observed as discrete punctate structures when immunostained with endophilin A2. An EGF pulse (180 ng/ml) for 5 min at 37°C also increased endophilin-positive structures. JEV infection also enhanced the endophilin-positive punctate structures at 15 mpi, which further increased at 30 mpi (S6b and S6c Fig). This suggests that like serum stimulation, high EGF doses, and JEV endocytosis can increase endophilin-positive structures, likely indicative of an upregulation of the FEME pathway. Collectively, our data on the genetic depletion of endophilin and molecular upregulation of FEME suggest a prominent role of this pathway in JEV endocytosis.

## Endophilin domain mutants block JEV internalization and replication

To further characterize the role of endophilin A2 for JEV internalization, we generated stable clones expressing EGFP tagged endophilin A2 full length (FL), or the domain truncated mutants ΔSH<sub>3</sub>, ΔH<sub>0</sub>, and ΔBAR in SH-SY5Y cells (Fig 3a). The over-expression of the endophilin domain truncated mutants will impose a dominant effect and override the endogenous protein function. The over-expression of the constructs was confirmed through immunoblotting with anti-GFP antibody. Western blot showed bands at the expected molecular weights for FL and truncated domains of endophilin A2 (Fig 3b). Confocal microscopy images show GFP expressing stable cells with EGFPc1, FL, ΔSH<sub>3</sub>, ΔH<sub>0</sub>, and ΔBAR overexpression (Fig 3c).

These clones were tested for cargo uptake assays to demonstrate their effect on EGF uptake at low and high concentrations. An increase in the uptake of fluorescently labelled EGF was observed in the cells expressing FL endoA2 as compared to EGFPc1 at both concentrations, indicating upregulation of the pathway upon endophilin A2 over-expression. Cells with the domain truncated mutants of ΔSH<sub>3</sub>, ΔH<sub>0</sub>, and ΔBAR displayed a decrease in the uptake of EGF (S7a Fig first & second panel, S7b and S7c). These mutants specifically perturb endophilin mediated endocytosis and not CME, as the uptake of Tf remains unchanged (S7a Fig third panel, and S7d). The impact of these stably overexpressing cells was



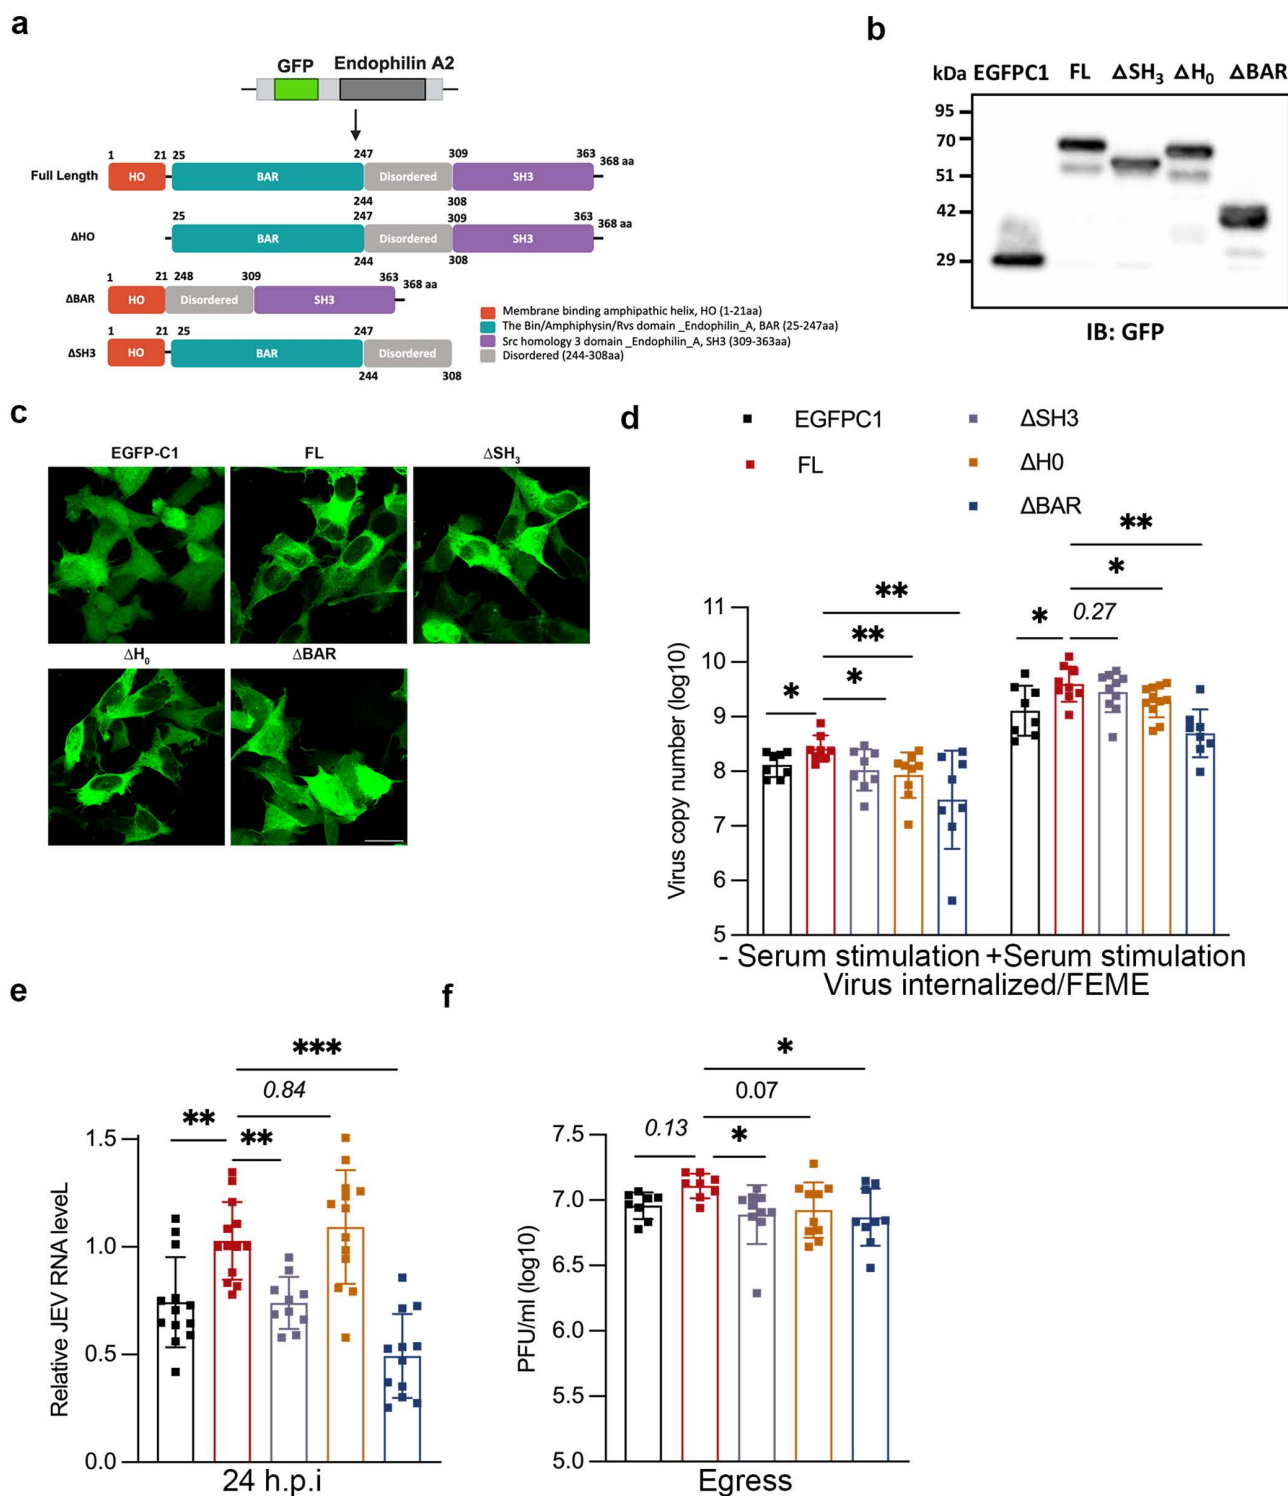

**Fig 3. Endophilin domain mutants block JEV internalization and replication.** (a) Schematic representation of the GFP endophilin A2 with full length (FL),  $\Delta$ SH<sub>3</sub>,  $\Delta$ H<sub>0</sub>, and  $\Delta$ BAR domains deletion mutants. Created in BioRender. Kalia, M. (2025) <https://BioRender.com/g4etbij> (b) Lysates of SH-SY5Y cells stably expressing EGFP-C1, FL,  $\Delta$ SH<sub>3</sub>,  $\Delta$ H<sub>0</sub>, and  $\Delta$ BAR domains were immunoblotted with anti-GFP antibody. (c) Confocal micrographs of cells stably expressing the various domains. Scale: 10  $\mu$ m (d) Endophilin domain mutant cell lines were stimulated with or without 20% FBS for 1 h at 37°C,

infected with 10 MOI for 1 h at 37°C, and harvested post 1 h with trypsin. The histogram represents the viral copy number of internalized virus particles. (e-f) Cells were infected with 1 MOI of JEV for 1 h and were harvested post-24 h. Viral RNA was determined by qRT-PCR (f), and the extracellular virus particles were detected with plaque assays (g). All values are represented as mean  $\pm$  S.D from at least two independent experiments. Statistical analysis was determined using ordinary one-way ANOVA with Dunnett's multiple comparison test with a 95% confidence level. Statistical significance: NEJM: 0.12 (ns), 0.033 (\*), 0.002 (\*\*), <0.001 (\*\*\*).

<https://doi.org/10.1371/journal.ppat.1013790.g003>

also checked on the fluid-phase uptake of FITC-dextran, which was unaltered (S7a Fig fourth panel, and S7e). These data demonstrate that the endophilin A2 domain deleted mutants exert a dominant negative effect in blocking EGF uptake in SH-SY5Y cells.

We next checked for the role of each of these domains on JEV internalization. The virus entry assays were next performed under FEME conditions: 37°C for 1 h to allow virus binding at 10 MOI, with subsequent internalization at 1 h at 37°C. Here, an increase in virus entry was observed with FL overexpressing cells compared to the empty vector. A subsequent decline in the virus entry was observed with all three truncated mutants, with a maximum decrease (~90%) with  $\Delta$ BAR-expressing cells. This result highlights the crucial role of the three main domains of endophilin A2 proteins in JEV entry (Fig 3d, left panel). To further strengthen our results, we checked virus entry in these mutant cell lines when stimulated with additional serum (20% FBS) to enhance FEME. Entry experiments showed an increase in virus copy numbers with FL compared to the empty vector, while the  $\Delta$ H<sub>0</sub> and  $\Delta$ BAR mutants showed a decrease of ~52% and 88% respectively (Fig 3d, right panel). We also checked the effect of these endophilin mutant cell lines on virus replication. As previously observed with our entry experiments, we observed an increased viral RNA level in cells over-expressing FL compared to empty vector. The  $\Delta$ SH<sub>3</sub> and  $\Delta$ BAR-expressing cells showed a reduction in virus replication as compared with the FL, and maximum inhibition was observed with  $\Delta$ BAR deletion (~50%) (Fig 3e). These results were also supported by reduced virus titers in  $\Delta$ SH<sub>3</sub> (~38%) and  $\Delta$ BAR (~43%) domain-expressing cells (Fig 3f). Collectively our data shows that over-expression of endophilin A2 enhances JEV uptake and also establishes a crucial role of the cargo receptor binding domain and the membrane curvature-inducing domains of endophilin A2 for JEV internalization.

### Pharmacological inhibition of actin cytoskeleton perturbs JEV entry and replication

Actin polymerization is crucial for multiple CIE pathways. The molecular mechanism of FEME is known to be an actin-driven pathway, vital for carrier formation and driving the vesicles into the cytoplasm. We checked for the role of the actin machinery in JEV entry through pharmacological inhibition of the pathway using various known inhibitors, Latrunculin A (Lat A) which inhibits actin polymerization [35], Jasplakinolide (Jas) which binds to F-actin and blocks the actin depolymerization [36], and Cytochalasin D (CytoD) which induces the depolymerization of actin filaments through binding to the G-actin leading to dimer formation and nucleation of the newly formed filaments [37,38]. The other small molecule inhibitors used were CK-548, which binds to the Arp2/3 complex and inhibits its ability to polymerize actin, and Wiskostatin, an N-WASP-mediated actin polymerization inhibitor [39]. Cell viability assays were performed to establish non-toxic drug concentrations: LatA (1 $\mu$ M), Jas (1 $\mu$ M), CytoD (5 $\mu$ M), CK-548 (50 $\mu$ M) and Wiskostatin (10 $\mu$ M) (S8a Fig). Cells pre-treated with the drugs for 1 h inhibited virus binding and internalization at 37°C (Fig 4a and 4b). This was also observed through confocal imaging, wherein treatment of cells with the drugs led to a decrease in virus endocytosis, which can be observed with a reduced number of envelope positive immunostained structures (Fig 4c and 4d). Treatment of cells with CytoD, CK-548 and Wiskostatin inhibited virus replication as observed by a decrease in viral RNA levels (S8b Fig) and virus titers (S8c Fig), thus confirming the critical role of a functional actin machinery for JEV infection.

Through confocal microscopy, we monitored changes in the actin cytoskeleton upon JEV entry at different time points, starting from 5 min to 60 min pi. Mock-infected cells showed cortical actin meshwork fibers with different well-aligned stress fibers, including dorsal and peripheral fibers (S9a Fig, uninfected panel). In the JEV-infected cells, by 5 min pi, the F-actin redistribution changed, and dense condensed F-actin filaments could be observed with long protrusions in the filopodia (S9a

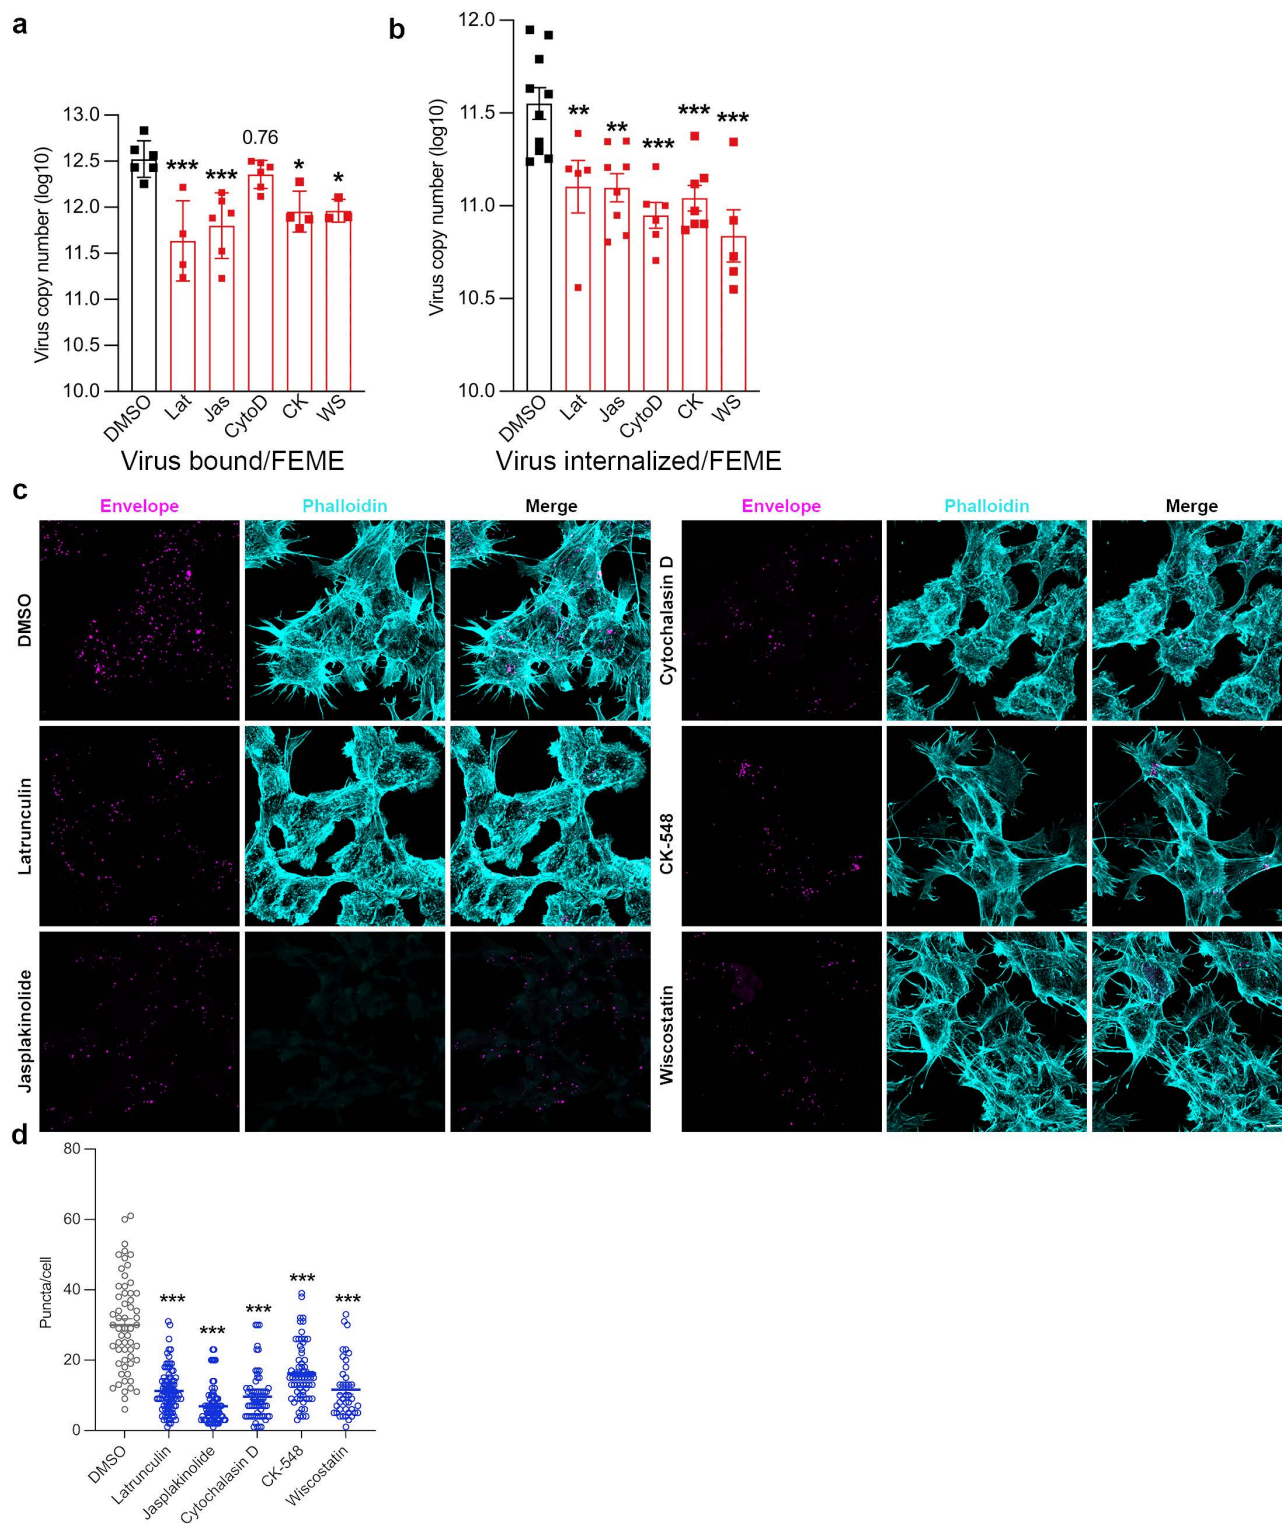

**Fig 4. Pharmacological inhibition of actin cytoskeleton perturbs JEV entry and replication.** (a-b) SH-SY5Y cells were pre-treated with DMSO control, LatA (1uM), Jas (1uM), CytoD (5uM), CK-548 (50uM) and Wiskostatin (10uM) for 1 h at 37°C, followed by 10 MOI JEV at 37°C for virus binding. Cells were harvested with trypsin treatment to remove extracellular virus particles. Absolute virus envelope copies were detected with qRT-PCR. (c) SH-SY5Y

cells were pre-treated with DMSO control/ drug for 1 h at 37°C subsequently followed with 100 MOI virus binding at 4°C. Cells were then shifted to 37°C for virus internalization for 15 min, fixed, immunostained with Alexa Fluor 546-phalloidin (cyan), and viral envelope particles (magenta) and imaged with 63x objective. The representative confocal micrograph shows the phalloidin-stained F-actin and JEV envelope puncta in the presence of actin inhibitors, scale: 10 µm. (d) The histogram quantifies the number of envelope positive puncta per cell analyzed through Image J. All values are represented as mean ± S.D./S.E.M; statistical analysis was determined with Ordinary one-way ANOVA/Kruskal-Wallis test with Dunn's multiple comparisons test. Statistical significance: NEJM: 0.12 (ns), 0.033 (\*), 0.002 (\*\*), < 0.001 (\*\*\*).

<https://doi.org/10.1371/journal.ppat.1013790.g004>

Fig, 5 min panel). By 10 min post-virus entry, increased and dense lamellipodia structures were observed (S9a Fig, 10 min panel). Long filopodia extensions were observed at 15 min and 30 min post-virus entry (S9a Fig, 15- and 30 min panel). The number of protrusions decreased by 60 min post-virus entry (S9a Fig, 60 min panel). We also checked actin rearrangements in primary cortical neurons infected with JEV, which showed multiple long protrusions with denser lamellipodium (S9b Fig).

### EGFR signaling is activated and essential for JEV entry

Several viruses such as ZIKV, PEDV, and IAV, can activate EGFR signaling cascade [40–42]. JEV has also been shown to activate EGFR-PI3K signaling during entry [19]. To test the same in our experimental setup, SH-SY5Y cells were infected with purified JEV, and the levels of phosphorylated EGFR were analyzed through western blotting at 0, 5, 10, 15, 30, and 60 min of virus internalization (Fig 5a). Compared to time-matched mock infected cells, autophosphorylated EGFR (Tyr1068) was detected in JEV-infected cells peaking at 15 min pi. EGF treatment (100 ng/ml) was also used as a positive control (Fig 5a). These observations were also confirmed with confocal microscopy, wherein EGF treatment or JEV entry resulted in the activation of p-EGFR compared to mock-infected cells (Fig 5b).

To examine the role of EGFR signaling in the context of JEV endocytosis, we utilized the broad-spectrum RTK inhibitor genistein, and the EGFR-specific inhibitors: gefitinib and erlotinib. To ensure that the drugs do not exert any cytotoxic effect, a cell viability assay was performed (S10a and S10b Fig). Serum-starved SH-SY5Y cells were pre-treated with 400 µg/ml of genistein or gefitinib for 5 h at 37°C. This did not alter virus binding or attachment (Fig 5c) but significantly reduced virus entry (Figs 5d and S10c), replication (Fig 5d), and production of infectious virions (Fig 5f). We further confirmed our results in primary cortical neurons and observed a significant reduction in JEV RNA levels and titers with genistein and gefitinib treatment (Fig 5g and 5h).

These observations were validated with erlotinib, another known small molecule inhibitor of EGFR tyrosine kinase activity. Erlotinib showed antiviral activity in SH-SY5Y cells with ~50% reduction in viral RNA levels at 24 hpi (Fig 5i). A similar inhibition in virus replication was also observed in primary cortical neurons (Fig 5j). Collectively, pharmacological inhibition of EGFR with both broad-spectrum and specific inhibitors was detrimental for virus entry and infection.

### JEV entry is impaired in EGFR depleted cells

We used siRNA targeting of the human EGFR gene to specifically knockdown its expression. SH-SY5Y cells were transfected with siNT or siEGFR, and a significant reduction in the EGFR mRNA levels was observed at 72 h of transfection compared to the control siRNA transfected cells (Fig 6a). As expected, the silencing of EGFR led to a decrease in the cargo uptake of fluorescently labelled EGF (S11a and S11b Fig). EGFR silencing resulted in a significant decrease in the virus binding (Fig 6b), and entry under both ice synchronization (Fig 6c), and FEME conditions (Fig 6d), suggesting the potential role of EGFR in virus attachment and entry. EGFR silencing also reduced viral RNA levels by ~40% at 24 hpi, associated with decreased virus titers (Fig 6e and 6f). These results indicate the role of EGFR as an essential entry co-factor for JEV internalization in neuronal cells.

### Ligand binding domain of EGFR plays a critical role in JEV entry

Since EGFR gene silencing inhibited virus attachment, we next explored the role of the EGFR ligand binding domain in virus entry. An antibody inhibition-based approach was used to specifically block the ligand binding domain of the receptor.



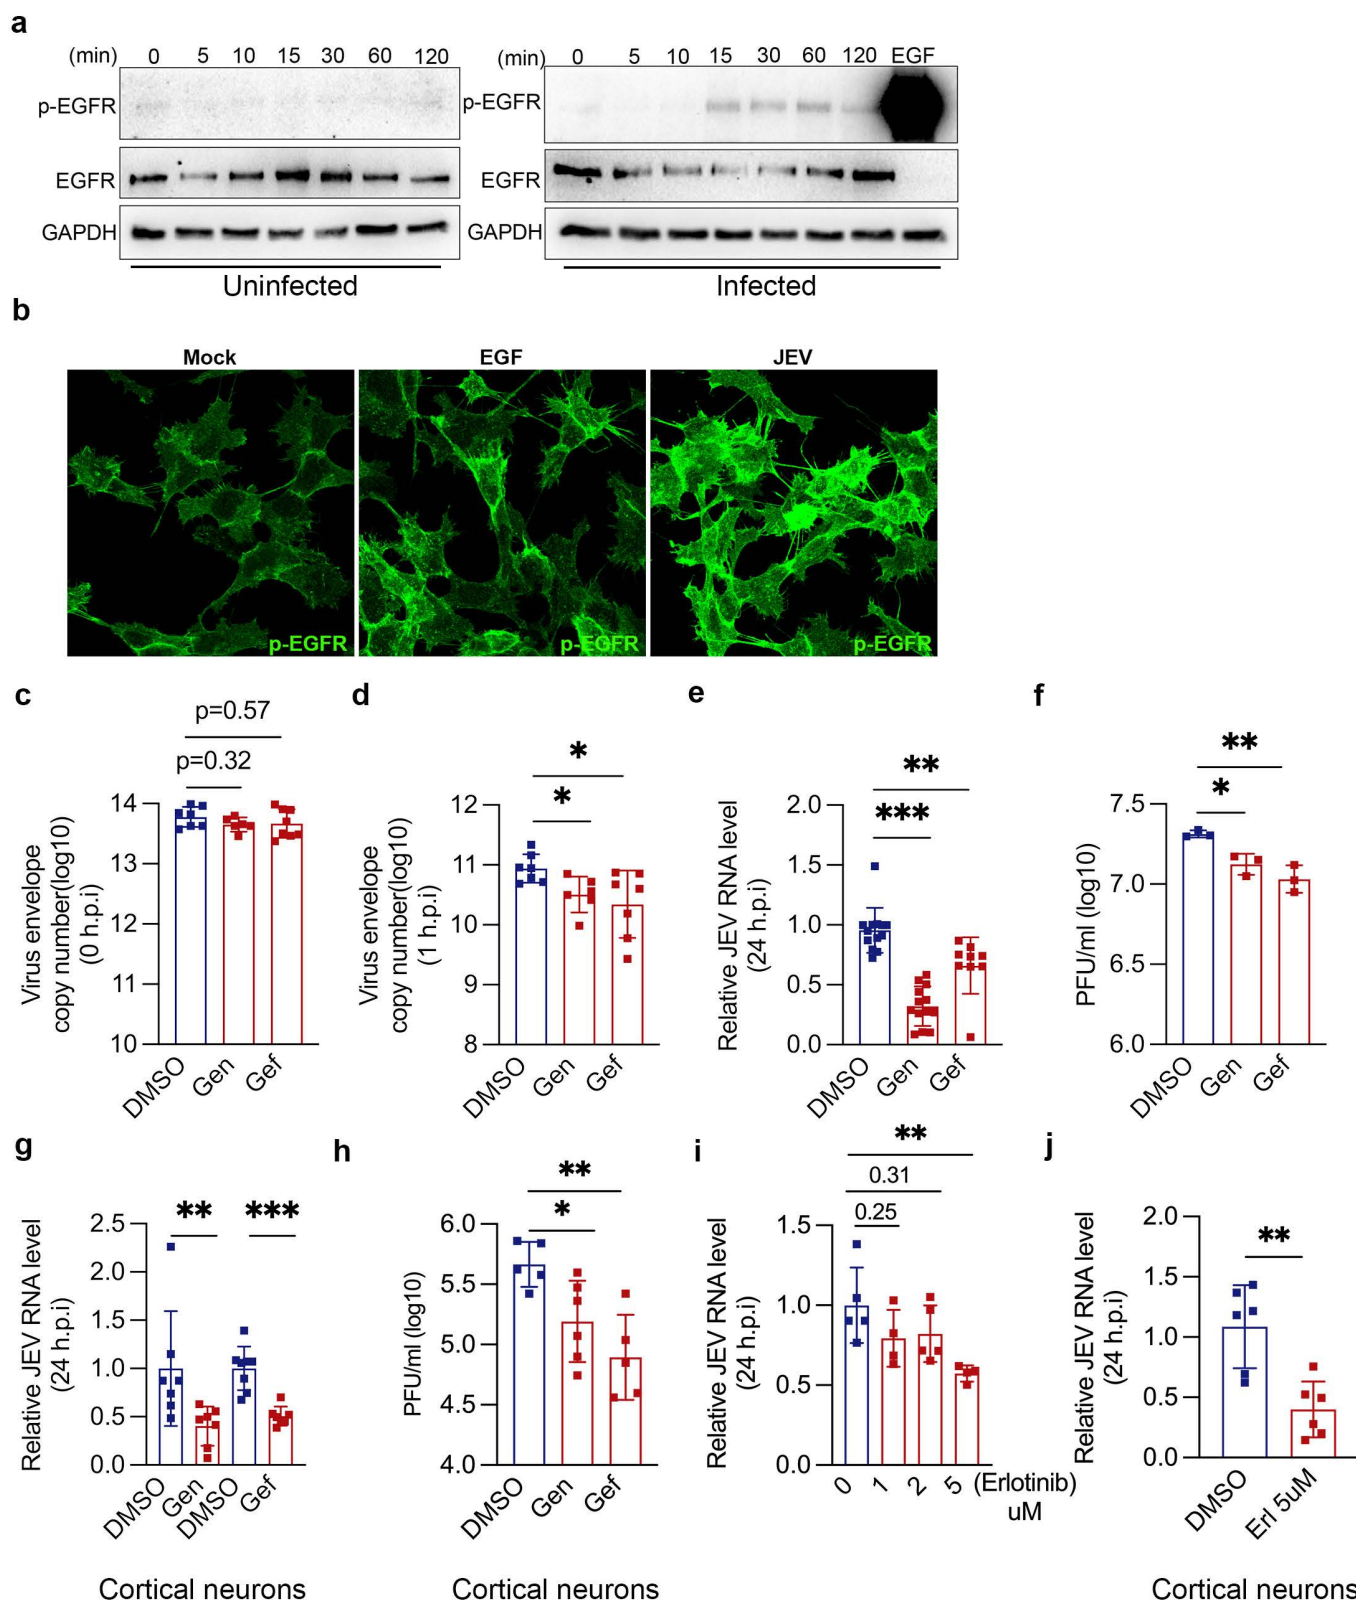

**Fig 5. EGFR signaling is activated and essential for JEV entry.** (a) SH-SY5Y cells were first allowed to bind with purified JEV at 4°C for 1h and were subsequently shifted to 37°C for 0, 5, 10, 15-, 30-, 60-, and 120-min. Cell lysates were analyzed through western blotting using p-EGFR, EGFR and

GAPDH (loading control) antibodies. (b) Representative confocal images of SH-SY5Y cells: mock, treated with EGF (100 ng/ml), or JEV (100 MOI, 4°C, 1h for attachment, and then shifted to 37°C for 15 min), immunostained with p-EGFR antibody. (c-f) SH-SY5Y cells, (g-h) primary cortical neurons, were serum starved overnight and treated with genistein (400 ug/ml) or gefitinib (400 ug/ml) for 5 h before infection. (c) Virus attachment assay (10 MOI, 4°C, 1h). (d) Virus entry assay (10 MOI, 4°C, 1h binding and then shifted to 37°C for 1h). (e-f) Virus replication assay (1 MOI, 37°C, 24 hpi). Viral RNA was determined by qRT-PCR (c-e), and the virus titers were quantified with plaque assays (f). (g-h) JEV RNA levels and titers in primary cortical neurons (1 MOI, 37°C, 24 hpi). (i-j) SH-SY5Y cells (i), primary cortical neurons (j), were pre-treated with erlotinib for 4 h at 37°C and then infected with JEV (1 MOI, 37°C, 24 hpi). Viral RNA was determined by qRT-PCR. Data shown are from two or more independent experiments represented as mean  $\pm$  S.D. Statistical analysis was determined by Ordinary one-way ANOVA with Dunnett's multiple comparison tests or the Mann-Whitney test with 95% confidence level. Statistical significance: NEJM: 0.12 (ns), 0.033 (\*), 0.002 (\*\*), < 0.001 (\*\*\*).

<https://doi.org/10.1371/journal.ppat.1013790.g005>

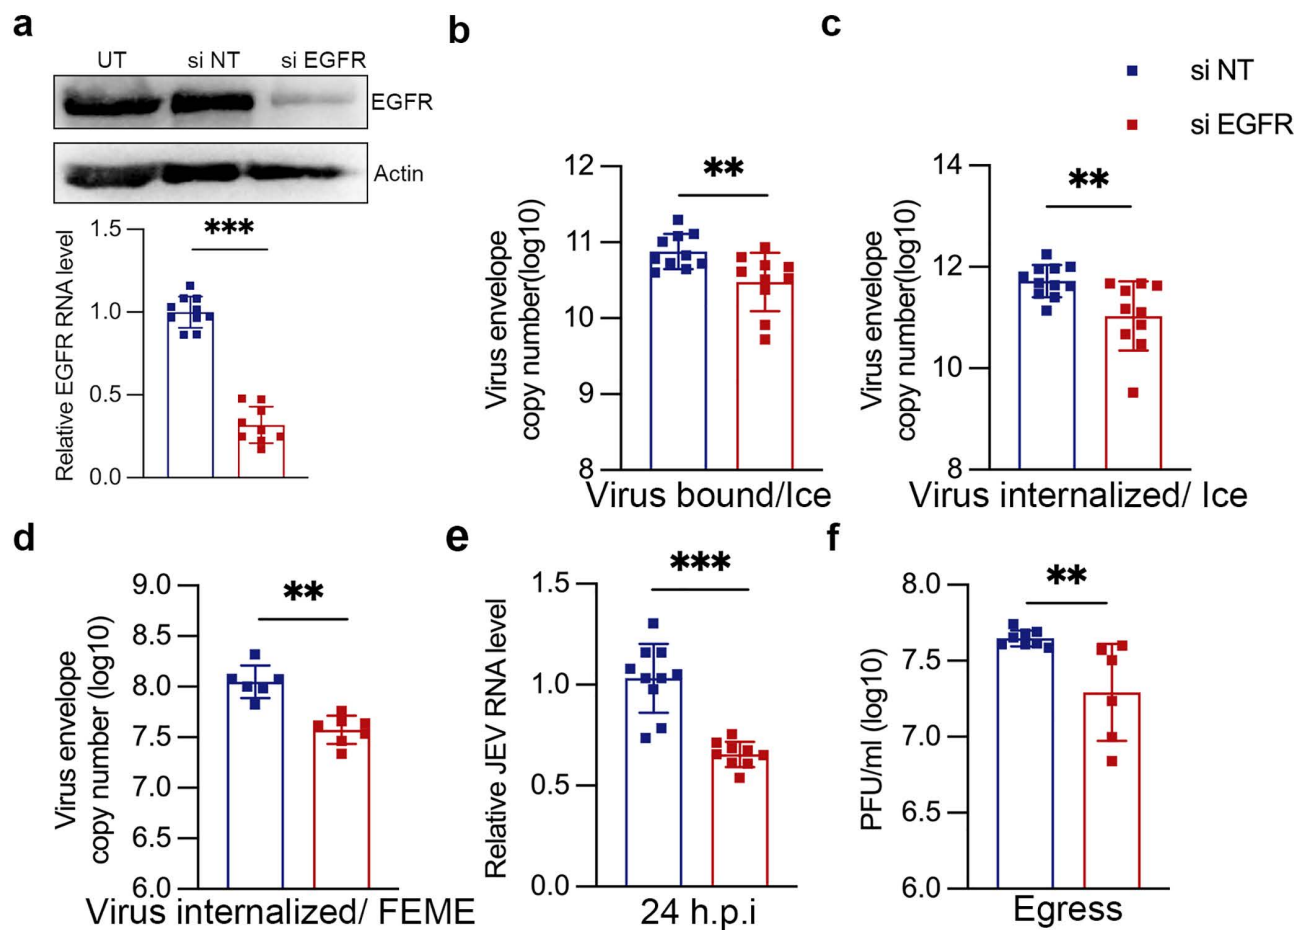

**Fig 6. Silencing of EGFR decreases JEV entry.** SH-SY5Y cells were transfected with siNT/si EGFR for 72 h. (a) Western blot shows protein level and Histogram shows the relative level of EGFR knockdown at the mRNA level post-siRNA transfection. (b) JEV attachment on cells (10 MOI, 4°C, 1h). (c) JEV internalization (10 MOI, 4°C, 1h binding and internalization at 37°C for 1h). (d) JEV internalization under FEME conditions (10 MOI, 37°C, 1h). (e-f) JEV replication (1 MOI, 24 hpi). JEV RNA levels were determined by qRT-PCR (b-e), and titers plaque assays (f). All values are represented from two or more independent experiments with mean  $\pm$  S.D. Statistical analysis was determined with Mann Whitney test with a 95% confidence level, NEJM: 0.12 (ns), 0.033 (\*), 0.002 (\*\*), < 0.001 (\*\*\*).

<https://doi.org/10.1371/journal.ppat.1013790.g006>

Incubation of cells with an EGFR epitope binding monoclonal antibody significantly decreased virus attachment (Fig 7a) and entry (Fig 7b), as compared to isotype control. This further manifested as reduced virus replication and egress at 24 hpi (Fig 7c and 7d). Thus, the EGFR ligand binding domain appeared to be critical for virus attachment on cells and further infection.

This was confirmed by treatment of cells with Cetuximab (Erbix), a recombinant human chimeric monoclonal IgG1 antibody which binds to the EGF binding domain [43]. Compared to the isotype control, cetuximab significantly decreased EGF uptake (Fig 7e and 7f). Consistent with the previous results, we also observed a reduction in JEV attachment, entry and replication in cetuximab-treated cells as compared to isotype control (Fig 7g–7i). This was also validated in primary cortical neurons, which showed similar inhibition of virus binding (Fig 7j). These results indicated the possibility that JEV could be binding to EGFR at a site that overlaps with the EGF binding.

To further elucidate this, we stimulated cells with EGF and observed its effect on the early events of the virus life cycle. The binding of EGF with its receptor EGFR leads to receptor dimerization and activation of the downstream signaling cascade. However, prolonged stimulation with EGF results in ligand-induced receptor degradation [44]. Surface EGFR levels were significantly reduced in cells upon dose dependent EGF pulse (S12a and S12b Fig). The effect of adding different doses of EGF was first checked on virus attachment. A stimulation step with 20% additional serum was also performed to activate FEME. Here, we observed a decrease in virus binding starting from 50 ng/ml of EGF (Fig 7k). These results suggested that incubation of both EGF and JEV could result in a competitive inhibition for binding to EGFR. Next, we treated the serum-stimulated cells with the above-mentioned doses of EGF before infection. This step was performed to activate the receptor internalization before infection. A decrease in virus binding was observed starting from 10 ng/ml of EGF, which decreased further with an increase in the EGF dose (Fig 7l). This might result from a reduced level of surface EGFR, which is essential for virus attachment. The EGF treatment also correlated with a reduction in the virus entry at 1 hpi starting from 20 ng/ml EGF dose, which decreased further with an increase in EGF dose (Fig 7m). Reduced virus replication and titers at 24 hpi was also observed (Fig 7n and 7o). Altogether, our results highlight two crucial observations: first, the importance of the accessibility of EGFR ligand binding domain during the initial virus attachment, and second, the availability of the surface receptor for virus entry.

### EGFR colocalizes with virions and interacts with ED3 domain of envelope protein

Our data suggests that JEV could potentially be associating with EGFR for attachment and entry into cells. Next, we checked for interaction of EGFR proteins with JEV particles during entry. SH-SY5Y cells were allowed to bind with JEV (MOI 100) on ice, followed by internalization for 0, 10, 30, and 60 min. The virus particles can be visualized with JEV-E antibody as punctate structures (magenta) (Fig 8a). Maximum number of envelope-positive structures were observed at 0- and 5-min post entry, which then reduced at 30- and 60-min pi. The virions were observed to be colocalized with EGFR as soon as 0 min post-entry, which corresponds to the initial binding of the virus on the cell surface. The colocalization of EGFR with envelope structures then gradually reduced starting from 10-min post-entry onwards (Fig 8b). A similar overlap of JEV capsid structures with the EGFR protein was observed in SIM imaging (S13a Fig). We also checked the colocalization of the virus particles with EGFR at early time-points of virus entry in primary cortical neurons, and a similar pattern of colocalization at 0 min was observed (S13b Fig). EGF uptake was enhanced in cells that had been infected with JEV first, likely due to activation of signaling that preconditions cells for increased endocytosis of EGF. Interestingly, EGF uptake in virus-infected cells showed clathrin dependence at higher concentrations, suggesting that JEV can impact the endocytosis pathway of EGFR (S14a and S14b Fig).

The immunoglobulin-like-E protein domain III (ED3) plays a major role in receptor binding and harbors key residues that bind to neutralizing antibodies [10,45]. We used the purified recombinant JEV-ED3 protein to test for specific interaction with EGFR and EGFR mutant protein vIII, which lacks the ligand binding ability with EGF or any known ligands, using BLI. Based on the obtained results, it was evident that the JEV-ED3 protein shows a significant preference for EGFR

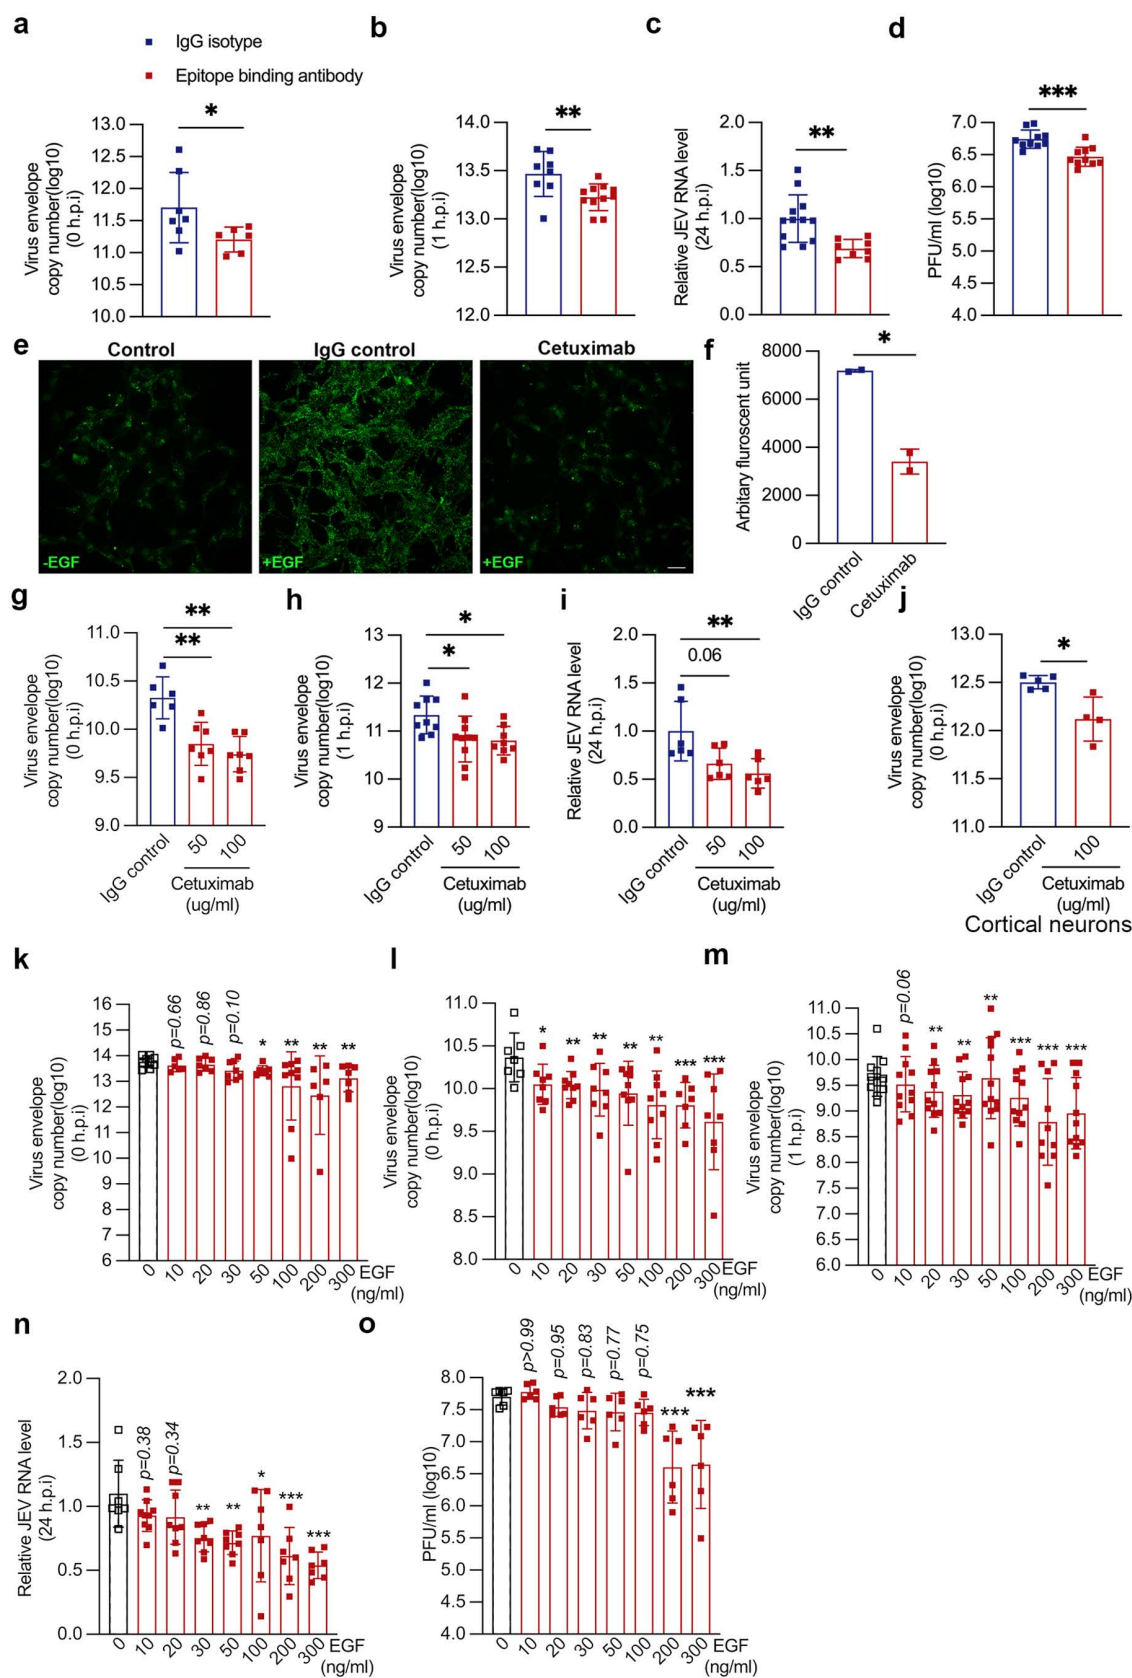



**Fig 7. Ligand binding domain of EGFR is essential for JEV entry.** (a-d) SH-SY5Y cells were pre-incubated on ice with an antibody mapping to a cell surface epitope of EGFR for 1 h. (a) JEV attachment (10 MOI on ice, 30 min). (b) JEV entry (10 MOI virus at 4°C for 30 min and then shifted to 37°C for 1 h). (c-d) JEV replication (1 MOI, 24 hpi). Viral RNA levels were determined by qRT-PCR (a-c) and titres by plaque assays (d). (e-f) SH-SY5Y cells were left untreated or incubated with IgG isotype control or cetuximab at 100 ug/ml concentration for 3 h at 37°C. Cells were then pulsed with Alexa fluor 555 EGF (100 ng/ml) for 5 mins at 37°C. (e) Representative images, scale: 20 µm. (f) Histogram quantifies the total fluorescent units of EGF uptake under untreated, IgG isotype control and cetuximab-treated conditions. Analysis was performed using image J software with ~100 cells/cover slip, represented as mean ± S.E.M. (g-j) Cells were pre-treated with either IgG isotype control or with cetuximab (50 and 100 ng/ml) at 37°C for 3 h. (g-i) Virus attachment (10 MOI, ice, 1 h) in SH-SY5Y cells (g), (h) Virus entry (10 MOI, ice 1 h, shifted to 37°C for 1 h). (i) Virus replication (1 MOI, 24 hpi), (j) Virus attachment (10 MOI, ice, 1 h) in primary cortical neurons. Viral RNA levels were quantified through qRT-PCR. (k) SH-SY5Y cells were serum stimulated with 20% FBS for 15 min at 37°C, and were allowed to bind with 10 MOI virus along with different doses of EGF at 4°C for 1 h. The histogram shows the bound viral copies detected through qRT-PCR. (l) Cells were serum-stimulated with 20% FBS, followed by EGF stimulation at 37°C for 15 min, and then 1 MOI virus at 4°C for 1 h. (m) Serum and EGF-stimulated cells were infected with 10 MOI viruses and different EGF concentrations for 1 h on ice and were harvested post 1 h with trypsin treatment. (n) Intracellular RNA levels were detected at 24 hpi, and (o) the extracellular viral load was detected through plaque assay. All values are represented as mean ± S.D from at least two independent experiments. Statistical analysis was determined by unpaired students' t-test or ordinary one-way ANOVA, with Dunnett's multiple comparison test, with a 95% confidence level. Statistical significance: NEJM: 0.12 (ns), 0.033 (\*), 0.002 (\*\*), <0.001 (\*\*\*).

<https://doi.org/10.1371/journal.ppat.1013790.g007>

compared to the EGFR mutant protein vIII (Fig 8c and 8d). The  $K_d$  value of JEV3 against EGFR was calculated to be  $283 \pm 75$  nM. Collectively, these results demonstrate the fundamental importance of the EGFR extracellular ligand binding domain and the intracellular kinase domain for JEV binding and entry.

## Discussion

Viruses exploit different endocytic pathways to enter the host cell. While CME remains the best characterised pathway till date, our understanding of CIE has expanded, and recent studies have highlighted the potential of these pathways as virus entry portals. This is likely to be influenced by the cell type and expression level of attachment factors and receptors. Several host proteins have been described as putative JEV receptors [15,46–49]. Studies have established that JEV enters through CME into various cell types such as fibroblast, epithelial, and insect [16,20–22,50,51], while it targets a clathrin-independent pathway for entry and infection in neuronal cells [16–19].

This study characterizes the pathway exploited by JEV for entry in the SH-SY5Y human neuronal cell line, and in mouse primary cortical neurons. In line with our previous observations in mouse Neuro2a cells, we observe an active dynamin-dependent CIE pathway operational for JEV entry in human neuronal SH-SY5Y cells, that is primarily controlled by the Endophilin protein. Endophilin A has been shown to be critical regulator of a receptor-mediated clathrin-independent pathway, also described as FEME [23]. Kinases such as Cyclin-dependent kinase 5 (Cdk5) and GSK3β inhibit dynein recruitment to FEME carries, and are thus negative regulators of this pathway [34]. With our triple knock-down approach to deplete all three endophilin A1/A2/A3 proteins as performed in the original study, we observed decreased JEV entry corresponding to reduced virus replication and titres. We also observe an increase in JEV internalization in SH-SY5Y cells and in primary cortical neurons upon treatment with a specific inhibitor of GSK3β. This establishes that activation of an endophilin-mediated pathway can lead to an increase in JEV internalization, and highlights the crucial role of GSK3β in regulating virus endocytosis. Endophilin proteins are associated with the distinctive feature of membrane curvature and formation of long tubular structures for vesicular trafficking. Ultrastructural studies also corroborate JEV localization within longer cavities at the cell surface that are distinct from classical clathrin-coated vesicles. Through immunofluorescence, we also observe strong colocalization of virions with Endophilin, and a substantial increase in endophilin-positive structures or assemblies upon JEV internalization. This aligns with FEME, where activation of the pathway with its specific cargo or serum stimulation increases endophilin-positive structures.

Endophilin mediated endocytosis has not been explored widely in the context of virus infection, with only one study showing that silencing of endophilin A2 decreases Enterovirus 71 infection [52]. Endophilin has been shown to interact with Moloney murine leukemia virus (Mo-MuLV) Gag protein, and with the mouse cytomegalovirus pM50 protein, and

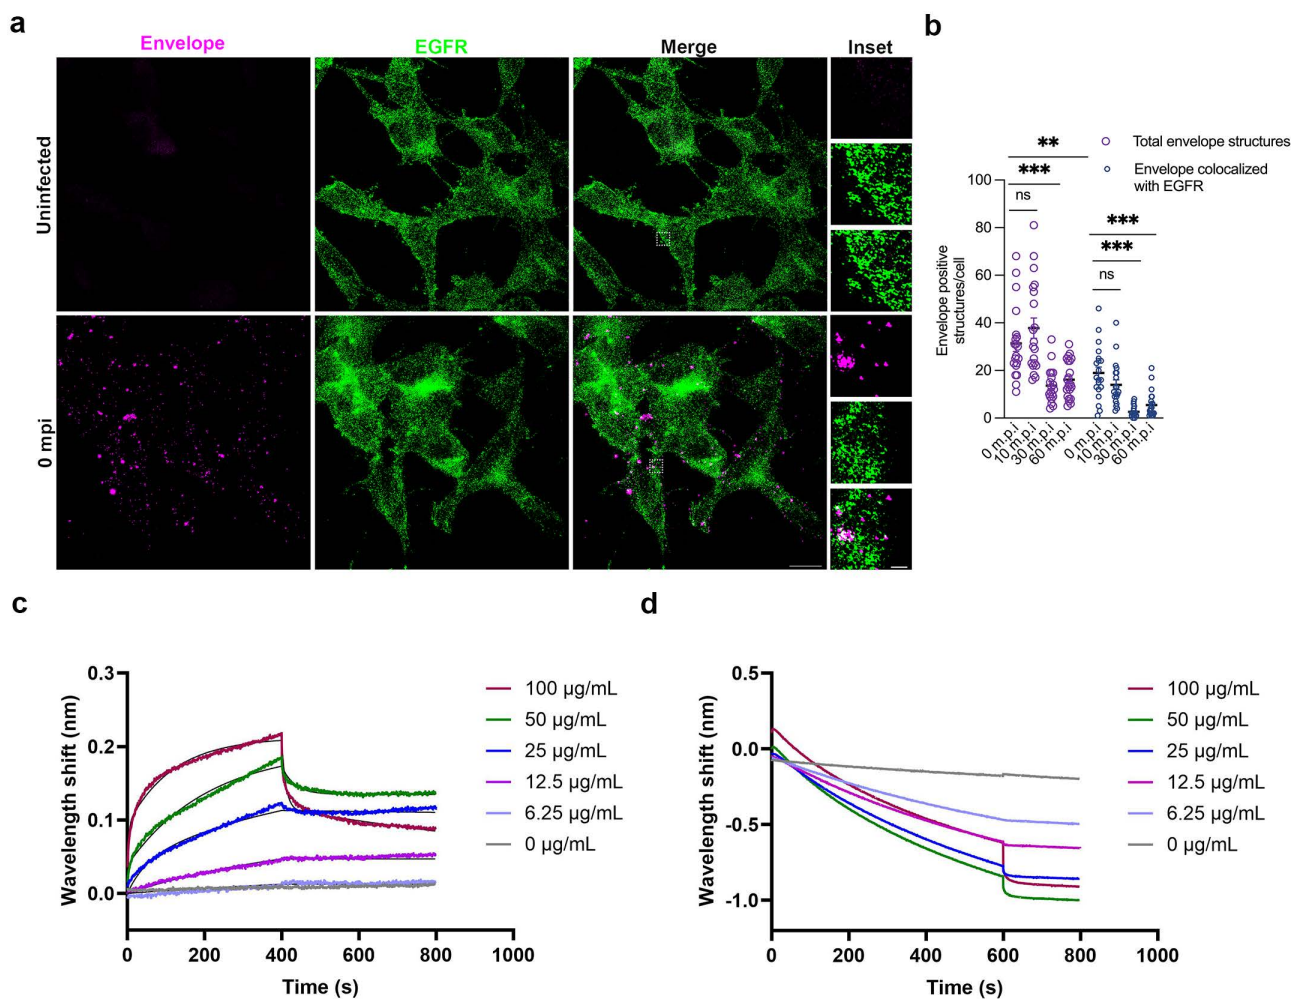

**Fig 8. EGFR colocalizes with virions and interacts with ED3 domain of envelope protein.** (a-b) SH-SY5Y cells were incubated with 100 MOI of virus for 1 h on ice and were subsequently fixed post at 0, 10, 30, and 60 mins of virus internalization. (a) Cells were immunostained with JEV envelope (magenta) and EGFR (green) antibodies. Confocal images for 0 mpi is shown for reference, other time points image not included. Insets show the zoomed image of envelope-positive structures colocalized with EGFR; scale: 10 µm, inset: 1 µm. Images were acquired in Elyra PS1 (Carl Zeiss Super-resolution microscope) using 63 x objective. (b) The histogram quantifies total envelope-positive structures and the number of envelope-positive structures colocalized with EGFR per cell at different time points. Image analysis was performed using Imaris. All values are represented as mean  $\pm$  S.E.M; statistical analysis was determined with Kruskal-Wallis test with Dunn's multiple comparisons test. Statistical significance: NEJM: 0.12 (ns), 0.033 (\*), 0.002(\*\*), <0.001(\*\*\*). (c-d) Bio-Layer Interferometry analysis of EGFR binding to JEV-ED3 protein. The association and dissociation curves resulting from the binding events are shown, wherein the real-time binding sensorgrams are represented in colored lines and their fitting curves are represented in black lines. (c) The JEV-ED3 protein is titrated against different concentrations of recombinant Human EGFR Protein (ECD, hFc Tag), ranging from 0–100 µg/ml. The equilibrium dissociation constants ( $K_D$ ) were calculated from three independent Human experiments using the Octet Data Analysis software's 2:1 (Heterologous binding model) binding model. (d) The JEV-ED3 protein is titrated against different concentrations of recombinant Human EGFR Protein (Isoform VIII, hFc Tag), ranging from 0–100 µg/ml. The binding experiment was repeated three times.

<https://doi.org/10.1371/journal.ppat.1013790.g008>

functions in membrane curvature formation and virion production [53,54]. Endophilin B2 has been shown to be essential for Influenza A viral RNA nuclear entry and replication [55].

Actin cytoskeleton network participates in both clathrin-dependent and independent pathways by providing a mechanical force to bend membrane and form endocytic pits. Multiple viruses such as CSFV, HIV-1, HCV, pseudorabies virus, HPV-16, Rhinovirus etc. utilize the actin machinery to facilitate their transport within the cell [56–61]. A study from our laboratory

performed an RNA interference-based screening of 136 human membrane trafficking genes in IMR-32 cells (human neuroblastoma) and identified RHOA, RAC1, PAK1, along with ARP2/3 complex, and N-WASP family proteins to be essential for JEV replication [17]. As demonstrated in the previous study, pharmacological disruption of the actin polymerization and depolymerisation, or inhibitors of the ARP2/3 complex, and N-WASP led to a decrease in virus internalization. These results were also supported by immunofluorescence studies wherein remodelling of the actin cytoskeleton structures with dense F-actin clusters were observed in infected cells, as compared to the characteristic actin filaments in uninfected cells.

RTKs has been associated with internalization of multiple viruses. EGFR is a member of human ErbB family of RTKs with three characteristics domains: an extracellular ligand binding domain, a transmembrane, and a cytoplasmic domain. Receptor activation can be ligand- dependent as well as -independent, with the physiological role of the ligand-independent activation not completely understood [62–64]. EGFR can be trafficked through clathrin dependent or independent pathways depending on the cellular growth conditions [65]. The CIE of EGFR is observed upon stimulation with high EGF concentrations, as there is a rapid need for receptors to undergo degradation to maintain the cellular homeostasis [23,33,66]. The receptor undergoes substantial ubiquitination at high ligand concentration mediated through an E3 ligase Cbl and hence switches to a CIE pathway [28,67].

Studies have shown that JEV internalization activates EGFR signaling through the EGFR-PI3K signaling axis promoting the RhoA-mediated F-actin polymerization in neuronal cells [19]. The activation of the EGFR-ERK signaling cascade during the early time of infection was also related with suppression of the interferon response in hBMECs [68]. However, it remains unclear how EGFR interacts with JEV to facilitate entry. In our present study, we observed that virus entry also resulted in an activation of EGFR signaling as observed with an increase in the phosphorylated EGFR levels, while inhibition of EGFR signaling led to a decrease in JEV internalization. These results highlight the central role of intracellular kinase domain along with the activation of downstream signaling cascade for virus entry. These results were further confirmed by the genetic knockdown of EGFR, which led to a decrease in JEV internalization. A reduction in JEV attachment was also observed with EGFR depletion, which suggested the active role of the extracellular ligand-binding domain as well. Treatment of cells with EGFR extracellular domain binding antibody, cetuximab, and EGF led to a decrease in JEV attachment and internalization, further supporting the hypothesis that EGFR could potentially be involved in the initial binding of JEV with the host cell surface. Treatment of cells with EGF further showed a decrease in JEV binding at 4°C where endocytosis has not yet initiated. Hence, our data indicates that interference with the ligand binding domain of EGFR prevents JEV binding and subsequently blocks virus internalization. Through high-resolution immunofluorescence microscopy, we observed strong colocalization of JEV envelope particles with EGFR at early times of infection, with the maximum colocalization observed at  $t=0$  min, highlighting the possibility of a direct association between the two. Interestingly, through BLI we observed a strong interaction of JEV ED3 domain with EGFR, but not with the mutant isoform. Overall, these data indicate a pivotal role of the EGFR signaling and extracellular ligand binding domain to be essential for JEV endocytosis through an endophilin mediated pathway dependent on dynamin and actin (Fig 9).

One limitation of our study is the use of high MOIs for immunofluorescence studies which was essential to enable an accurate quantitation of virus binding and early entry events. Infection at these high MOIs can potentially alter virus replication kinetics resulting in rapid replication and cell death. These conditions are unlikely to exist in a natural infection except under conditions of direct cell to cell transmission.

Virus entry represents an ideal target for antiviral drug development. Our study describes two critical host proteins that are exploited by JEV for entry in neuronal cells that are fundamental physiological signaling hubs. Design of small molecules or drugs targeting these molecules is likely to be challenging and highlights the need for a more nuanced understanding of virus-host interactions. Further characterization of these virus entry pathways is essential and may lead to the identification of host factors that could be temporarily blocked for their activity without compromising the health of the host. Entry inhibitors can also be employed in combination therapy with direct acting antivirals or other drugs targeting alternate steps of the virus-life cycle.

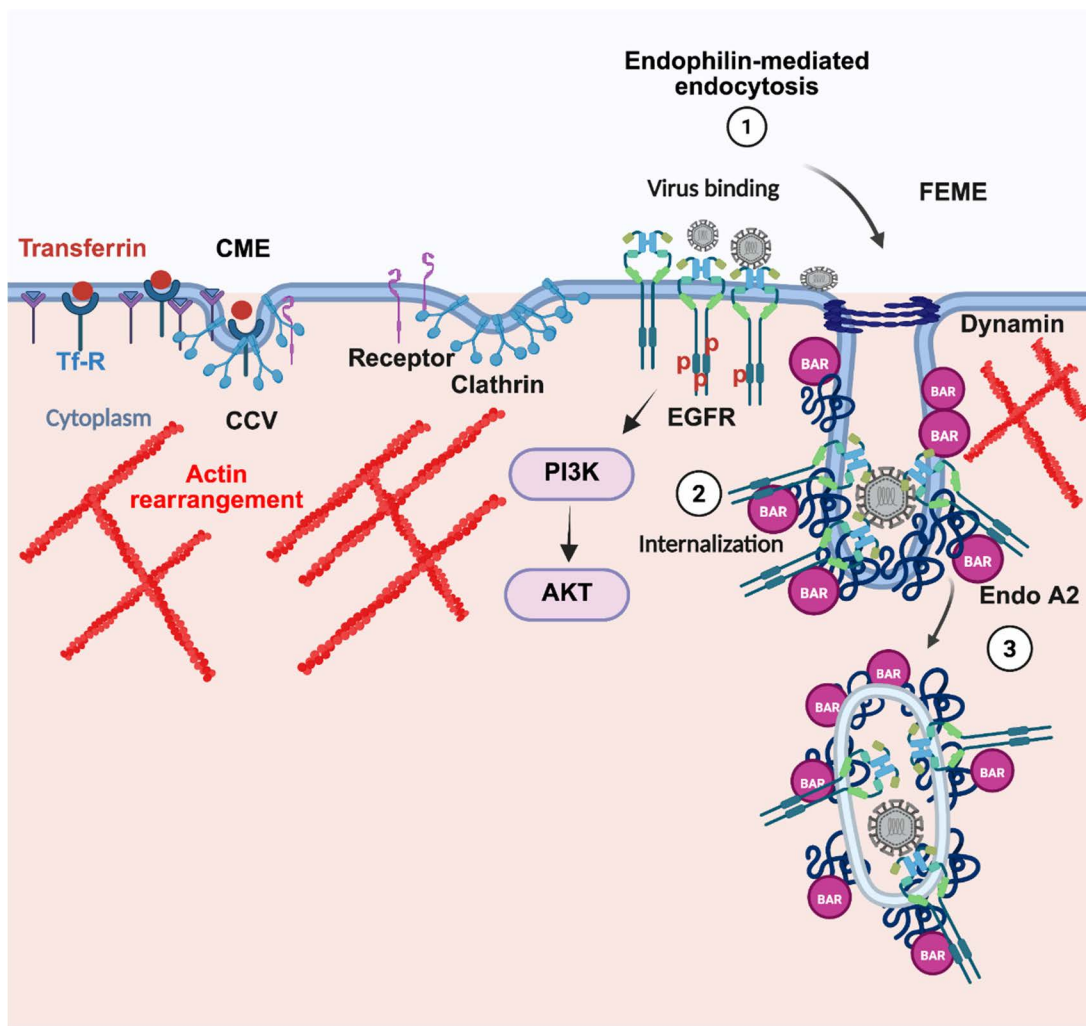

**Fig 9. Schematic model depicting the mechanism of JEV endocytosis in neuronal cells.** Viral entry is initiated with attachment to the host cell surface and subsequent binding to the putative receptor. [1] EGFR is a host factor for both virus cell surface attachment and entry, with a critical role of its ligand-binding domain. [2] Virus particles are endocytosed through endophilin and dynamin dependent endocytosis. Dynamic actin remodeling plays an essential role during virus entry [2]. Created in BioRender. Kalia, M. (2025) <https://BioRender.com/7s5cpim>.

<https://doi.org/10.1371/journal.ppat.1013790.g009>

## Materials and methods

### Ethics statement

All animal experiments were approved by the Institutional Animal Ethics Committee of the Regional Centre for Biotechnology (RCB/IAEC/2022/114). Mice were maintained and experiments were performed as per the guidelines of the Committee for the Purpose of Control and Supervision of Experiments on Animals (CPCSEA), Government of India.

### Cell lines and virus

Human neuroblastoma cell line SH-SY5Y was obtained from ATCC. Vero and C6/36 cell lines were obtained from the cell repository of National Centre for Cell Sciences Pune, India. SH-SY5Y cells were cultured in HiGlutaXL Dulbecco's



modified eagle medium (DMEM), C6/36 cells in Leibovitz's L-15 Medium, Vero cells in Minimum essential medium Eagle (MEM) and HeLa cells in DMEM. All media for culturing was supplemented with 10% FBS and 1X penicillin-streptomycin-glutamine (PSG). All reagents used in the study are listed in [S1 Table](#).

JEV Vellore strain P20778 (GenBank accession no. AF080251) was generated in insect cell line C6/36 in 2% FBS with 1X penicillin-streptomycin-glutamine (PSG).

### **Virus generation and purification**

C6/36 cells were infected with JEV 0.1 MOI at a confluency of 70–80% for 1 h and were supplemented with 2% FBS containing L-15 media. Supernatant containing the virus particles were harvested when ~80% of the cells showed cytopathic effect at approximately 72 h post infection (pi). Virus particles were collected by centrifugation at  $1,000 \times g$  for 15 min at  $4^{\circ}\text{C}$ . Virus concentration was done through multiple cycles of centrifugation of the collected supernatant with Amicon Ultra Centrifugal Filter, 100 kDa MWCO at  $1,000 \times g$  for 15 min at  $4^{\circ}\text{C}$ . For virus purification, the virus containing supernatant was first concentrated through PEG precipitation, followed with purification over 20% sucrose cushion through ultracentrifugation at  $80,000 \times g$  for 4 h at  $4^{\circ}\text{C}$  [16].

### **Virus titration**

Virus titre estimation was performed by plaque assays on Vero cells. Cells were plated in 12-well plate and were infected with 10-fold serially diluted virus supernatant for 1 hr at  $37^{\circ}\text{C}$ . Virus inoculum was removed post 1 h and cells were washed with PBS twice after which they were overlaid with low-melting-point agarose and 2X MEM in 1:1 ratio for 5 days at  $37^{\circ}\text{C}$  until the plaques became visible. Cells were then fixed in 3.75% formaldehyde overnight and the agarose plug were removed followed with staining with 0.1% crystal violet blue for plaque visualization. Titres were determining by counting the number of plaques in the lowest dilutions were they were visible for counting which were represented as plaque forming units (pfu/ml).

### **Small interfering RNA (siRNA) depletion and virus assays**

Cells seeded in 24-well plate were double transfected (day 1 and day 2) with 25 nM siRNA on each day with DharmaFECT 1 transfection reagent according to the manufacturers instruction. Cells were transfected for 72 h before virus infection assays. Knockdown efficiency was checked through qRT-PCR and western blotting. Virus entry assays were performed by allowing the virus 10 MOI to bind on ice for 1 h followed with removing the virus inoculum. Cells were shifted to  $37^{\circ}\text{C}$  to allow virus internalization for 1 h and were washed with 1X PBS twice followed with treatment with trypsin to remove extracellular bound virus particles. Cells were then washed with PBS and were harvested with TRIzol for RNA extraction and qRT-PCR. For virus entry assay under FEME conditions, cells were infected with virus 10 MOI for 1 h at  $37^{\circ}\text{C}$  followed with virus inoculum removal. Cells were washed with PBS and were either harvested immediately with trypsin treatment (0 hpi) or kept for another 1 h in complete media (1 hpi) followed with trypsin treatment to harvest cells with TRIzol. qRT-PCR was performed with primers against JEV envelope region to measure the absolute viral copy numbers. For virus binding or attachment studies, cells were infected with virus 10 MOI on ice for 1 h to allow virus particles to bind. Cells were washed with chilled PBS and were harvested with TRIzol for RNA isolation and qRT-PCR. For virus infection assays, cells were infected with JEV 1 MOI for 1 h and were washed with PBS. Cells were then kept in complete media for 24 h and were harvested with TRIzol. qRT-PCR was done to measure virus RNA levels. For immunofluorescence based virus entry assays, cells were infected with virus of 100 MOI on ice and were shifted to  $37^{\circ}\text{C}$  for different time intervals subsequently fixing it with 4% PFA.

### **RNA isolation and Quantitative Real Time (qRT)-PCR**

RNA extraction was performed with TRIzol RNAiso Plus reagent using a phenol-chloroform based method. Briefly, cells were harvested with TRIzol and were homogenized by pipetting multiple times. 100  $\mu\text{l}$  of chloroform was added per

sample and was incubated for 2 mins at RT followed with centrifugation at 12000rpm for 15 min at 4°C to allow phase separation. The clear aqueous phase was separated and 250 ul isopropanol was added. The samples were incubated at room temperature for 15min to allow RNA precipitation and were centrifuged at 12000 rpm for 15 min at 4°C. The supernatant was discarded and the pellet was washed with chilled 75% ethanol with centrifugation at 12000 rpm for 15 min at 4°C. Samples were air dried and were resuspended in nuclease free water by heating at 55°C for 10 min. cDNA preparation was done using Prime-script Transcription kit and real-time PCR was performed using Quant Studio 6 (Applied Biosystems). All the primer sequences used are mentioned in Table A in [S2 Table](#).

### Western blotting

Cell lysis was performed in lysis buffer containing 150 mM NaCl, 1% Triton X-100, 50 mM Tris-HCl pH 7.5, with 1 mM PMSF, and protease inhibitor cocktail for 60 min on ice. Supernatant collected were used for protein quantification using BCA assay kit. 5X loading was added to the cell lysates and these were heated at 95°C for 10 min. Equal concentration of protein lysates were run on a SDS-PAGE gel and transferred to PVDF membrane for immunoblotting. Membranes were cut according to the size of the desired protein and were blocked in 5% not fat milk in 1X PBS/TBS for 1 h at RT. Primary antibody incubation was done in the blocking solution at the desired antibody dilution at 4°C overnight. Membrane were washed 3 times with 1x PBST/TBST (1% tween in PBS/TBS). Secondary HRP-conjugated antibody was diluted in milk and was incubated for 1 h at RT. Membrane was washed thrice with 1x PBST/TBST, and bands were revealed with chemiluminescence using HRP substrate.

### Transmission electron microscopy

SH-SY5Y cells were infected with JEV (MOI 200), incubated in ice for 2 hours and were fixed at 30 seconds post infection in 2.5% glutaraldehyde and 2% PFA in 0.1M sodium cacodylate buffer, followed by post-fixation in 1% osmium tetroxide, dehydration in ethanol, and embedded in LR white resin (Ted Pella). Blocks were sectioned using Leica UC7 Ultramicrotome 5-glass knives. Sections were examined at RT with a transmission electron microscope (Tallos, L120C) at 11kx.

### Gene cloning and stable mutant cell line generation

Full-length (FL) Human Endophilin A2 (Endo-A2)/SH3GL1 (Gene ID: 6455, NP\_003016.1) and different functional domain mutants were cloned into mammalian expression vector pEGFP\_C1 to obtain N-terminus GFP-tagged fusion protein. Domain specific regions were classified based on the NCBI database. Briefly, full length Endo-A2 (368 aa) was generated by PCR as BglII/EcoRI fragments (FL-F and FL-R) and subcloned into pEGFP\_C1 at the same sites. Similarly, fragments expressing 22–368 aa and 1–308 aa were PCR amplified from cDNA, using primers ( $\Delta H_0$ -F and R and  $\Delta SH_3$ -F and R, respectively) with 5' and 3' tail containing BglII and EcoRI sites, for directional cloning into the pEGFP\_C1 vector. These constructs were referred to as EGFP- $\Delta H_0$  (22–368 aa) and EGFP- $\Delta SH_3$  (1–308 aa), respectively.

Overlap extension PCR was used to construct the BAR-domain mutant. This chimera consists of N-terminal 1–24 residues fused to the C-terminal 248–368 aa of Endo A2. In the first round PCR, fragment 1 viz. 1–24 aa was amplified using ( $\Delta H_0$ -F and  $\Delta BAR_1$ -R) primers whereas fragment 2 viz. 248–368 aa was amplified using the primers ( $\Delta BAR_2$ -F and  $\Delta SH_3$ -R), and both the fragments were then gel purified. The chimeric primers viz.  $\Delta BAR_2$ -F and  $\Delta BAR_1$ -R contains ~12bp overhangs at the 5' end, which are complementary to fragment 1 and fragment 2, respectively. In a 2-step overlap extension, two purified fragments (fragment 1 and 2) were mixed in equimolar concentration (0.1 pmol each) for overlap extension PCR performed as follows: thirteen cycles of 10 sec at 92°C (denaturation), 1 min at 60°C (annealing) and 72°C for 50 sec (extension). In step 2, resulting PCR product was taken as a template for the nested PCR, where extreme end primers viz.  $\Delta BAR_1$ -F and  $\Delta BAR_2$ -R were used for the amplification of the full length (147aa) hybrid fragment. The fusion product was then digested and ligated into pEGFP\_C1 vector at BglII-EcoRI sites to generate EGFP- $\Delta BAR$ . The

recombinant plasmids were transformed into DH5 $\alpha$  E. coli strains and screened for the positive clones. All constructs were verified by sequencing. To generate the stable cell lines expressing different domain mutants of Endo-A2, SH-SY5Y cells were seeded in 24 well plate overnight and transfected with the respective plasmids viz. pEGFP\_C1 (empty vector), EGFP-FL (full length), EGFP- $\Delta$ HO, EGFP- $\Delta$ SH3 and EGFP- $\Delta$ BAR. Briefly, cells were transfected with plasmid concentration of 2  $\mu$ g using Lipofectamine™ 3000 Transfection Reagent according to the manufacturer's protocol. Stably expressing cells with EGFP\_C1 constructs were selected with neomycin (800  $\mu$ g/ml) for 4-weeks and were sorted using flow cytometry for varied GFP intensities. Cells with high GFP signals were grown in antibiotic selection pressure and expression of tagged-protein variants was confirmed by immunofluorescence and immunoblotting. All the primer sequences used for cloning are mentioned in Table B in [S2 Table](#).

### Primary cortical neurons isolation and culture

Primary cortical neurons were isolated from a previously described protocol [69]. Briefly, embryos were collected from pregnant mice at embryonic day E.16.5 from C57/BL6 mice through decapitation from the pregnant mice in ice-cold dissociation media, HBSS (1X sodium pyruvate, 20% glucose, 1 M HEPES, pH 7.3). The cortices were gently dissected from the brain and were collected in the dissociation media. Tissues were washed and digested with trypsin and DNase I at 37°C for 20 min. Single cell suspension were collected, washed twice and finally resuspended in neurobasal medium supplemented with 10% FBS, 20% glucose, 1X Sodium pyruvate, and antibiotics. The neurons isolated were plated on poly-L-lysine coated plates. The media was changed the following day upon adherence of the neurons on the plate with maintenance media (neurobasal B-27, 1X glutamine, penicillin-streptomycin solution).

### Antibody inhibition assays

Cells were seeded in 96-well plate and were allowed to bind on ice for 1 h with 50  $\mu$ g/ml of the control (negative) mouse IgG and with specific EGFR antibody against the epitope binding domain (sc-120). This was followed with chilled ice cold PBS washes twice and were subsequently infected with JEV (1 MOI) for 30 min on ice. Cells were washed with chilled PBS and were incubated with complete media for 24 h. Cells were harvested post 24 h and were proceeded with RNA extraction and qRT-PCR. Plaque assays was performed to check virus titres collected from the supernatant. For virus binding/entry assays, post incubation with antibodies, cells were infected with JEV (10 MOI) for 30 min on ice and were washed with chilled PBS twice before harvesting with TRIzol (0 hpi) or adding complete media for 1 h at 37°C (1 hpi). Cells were washed and were treated with trypsin to remove non-internalized virus particles followed with PBS wash and were harvested with TRIzol reagent for RNA extraction and qRT-PCR.

### EGF stimulation and virus infection assay

Cells were seeded in 24-well plates overnight and were stimulated with 20% serum for 15 min at 37°C to activate FEME. For virus binding assay, cells were either EGF stimulated or not, followed with incubation with both virus (10 MOI) and increasing concentration of EGF at 4°C for 1 h. Cells were harvested followed with RNA extraction, cDNA preparation and qRT-PCR. For entry assay, cells were stimulated with increasing concentration of EGF for 15 mins at 37°C and were subsequently allowed to bind with JEV (10 MOI) and with the increasing EGF concentration on ice for 1 h. Cells were washed with ice cold PBS and were incubated at 37°C for 1 h with complete media. Cells were harvested with TRIzol post 1 h after trypsin treatment. For studies of virus replication, the serum and EGF stimulated cells were infected with 1 MOI virus followed with harvesting at 24 hpi.

### Cargo uptake assay

For endocytic cargo uptake assays, cells were seeded in coverslip coated 24-well plate overnight. Post-transfection with siRNA for 72 h, for Tf uptake assay, cells were serum starved for 30 mins at 37°C. Cells were pulsed with Alexa fluor

labelled Tf of concentration 20 ng/well for 5 min at 37°C. Cells were washed with acid wash buffer and subsequently with PBS twice to remove uninternalized Tf. Cells were fixed with 4% PFA for 15 min at 37°C. For EGF uptake assay, cells were never serum starved, and were pulsed with different EGF concentrations of 10, 20, 50, or 180 ng/ml for 5 min at 37°C. Cells were then washed with PBS twice to remove uninternalized EGF and were subsequently fixed with 4% PFA for 15 min at 37°C.

### Cell viability assay

SH-SY5Y cells were seeded in 96-well plate and were either left untreated (DMSO control) or treated with the drugs with the different concentrations. After 5 h post treatment, MTT was added at a final concentration of 0.5 mg/ml for 3 h followed by addition of solubilization solution to stop the reaction. OD was measured at 570 nm using a plate reader. The percentage cell viability was then calculated and normalized to DMSO treated control cells.

### Immunofluorescence studies

**Immunofluorescence staining and image acquisition.** Cells grown on coverslips were either transfected with siRNA, plasmid or were infected with JEV MOI 100 for immunofluorescence based entry experiments. A high MOI was chosen for these experiments since labelled virus particles as visualised as sub-resolution specs and lower MOIs result in very little signal that are difficult to distinguish from background. Virus infection was performed on ice for 1 h followed with subsequent removal of the inoculum, washing and incubating the cells at different time intervals at 37°C. Cells were then fixed with 4% PFA for 15 min at 37°C. Immunostaining was performed by permeabilizing with 0.3% tween or 0.05% saponin, blocking in 1% BSA in PBS, incubating in primary antibody for 1 h at RT or overnight at 4°C, followed by fluorescent tagged secondary antibody for 1 h at RT. Cells were mounted under Prolong gold reagent with DAPI. Cells were imaged using Laser confocal scanning Leica TCS SP8 microscope or Elyra PS1 (Carl Zeiss Super-resolution microscope) using 63 x objectives.

**Surface EGFR immunostaining.** Cell surface staining of EGFR was performed using a previously described protocol [23]. Briefly, cells grown on coverslips were incubated at 4°C for 1 h with 5 mg/ml of anti-EGFR monoclonal antibody (mapping to cell surface epitope of EGFR) diluted in 5% BSA. This was followed by a quick cold PBS wash and fixation in 4% PFA for 30 min on ice. After three PBS washes and one quick wash with PBS supplemented with 50 mM NH<sub>4</sub>Cl, cells were incubated with Alexa-fluor tagged secondary antibody for 1 h at RT. Cells were washed, stained with DAPI and mounted in Prolong gold reagent. Images were acquired using a Leica Stellaris microscope using 63 x objective.

**Phalloidin staining.** Cells grown on coverslips were fixed in 4% PFA solution for 15 min at room temperature and were washed thrice with PBS. Cells were permeabilized in 0.3% tween for 15 mins, washed and blocked in 1% BSA in PBS. Cells were incubated with primary antibody for 1 h at RT or overnight at 4°C, followed by fluorescent tagged secondary antibody combined with Alexa Fluor 546-conjugated phalloidin (1:40, Invitrogen, A22283) for 1 h at RT. Cells were washed, stained with DAPI and mounted in Prolong gold reagent.

**Quantification of cargo uptake assay images.** Image quantification of cargo uptake assays was performed using Image J software. Briefly, approximately ~100 cells per coverslip were used for analysis. Bright field image was used to draw cell boundary to generate region of interest against each cell with manual free hand tool. This was followed with integrated fluorescent intensity calculation with measure tool from respective channels. Graph were plotted as mean ± SEM.

**Quantification of colocalization for SIM images.** For quantification of colocalization in SIM images, an object-object based colocalization approach was utilized in Imaris version 9.9. A region of interest was created around each cell using the surface function. Spots were generated for each channel based on the size of the puncta. Briefly, the size of few puncta were measured, and subsequently based on the size of the spots, a size was set for each channel. The threshold was set manually for each cell for all the channels to obtain all the spots visible in three-dimensional viewer. The spots for



all the channels to be quantified were created similarly. The colocalization between any of the channels was measured with calculating the shortest distance between two spots. A shortest distance parameter of 0.5  $\mu\text{m}$  was set. Based on this the spots with distance within 0.5  $\mu\text{m}$  were considered as colocalized.

### JEV ED3 protein purification

JEV ED3 protein purification was performed from a previously described protocol from [10]. Briefly, *E. coli* BL-21(DE3) cells transformed with pET28a plasmid carrying the ED3 cDNA (aa 303–398) with a c-terminal His-tag were grown at 37°C till the  $\text{O.D}_{600}$  reaches 0.6–0.8. The protein expression was induced by adding 1 mM IPTG (Isopropyl  $\beta$ -D-1-thiogalactopyranoside) at 30°C for 4h with constant shaking at 200rpm. The induced bacterial pellet was lysed under denaturing conditions in lysis buffer for 1h with continuous swirling at 37°C (100mM  $\text{NaH}_2\text{PO}_4$ , 10mM Tris-HCl, 8 M urea, pH 8.0, 1:50 PI and 1:50 PMSF). Ni-NTA beads were added to the cell supernatant for protein purification and was eluted in 8 M urea containing 200mM imidazole at pH 8. The elute was dialyzed against 8 M, 6 M, 4 M, 3 M, 2 M, 1M urea and finally in PBS. Dialyzed protein was collected and centrifuged at 12000rpm for 90 min at 4°C and supernatant was concentrated using 3 KDa Amicon filter. The protein concentration was determined using BCA and ED3 protein bands were confirmed using western blots as a single band at ~10 KDa molecular weight.

### Biolayer Interferometry (BLI)

All the binding experiments were performed using an Octet RED96 (Forte Bio) at 30°C with shaking at 800rpm. Prior to use, the Ni-NTA biosensors were loaded into the columns of a biosensor holding plate and pre-hydrated in assay buffer for 15min. Protein JEV-ED3 with a c-terminal His-tag was immobilized on Ni-NTA biosensor tips (Forte Bio) at a concentration of 20  $\mu\text{g}/\text{mL}$  in an assay buffer containing PBS. Binding interactions were measured by submerging the JEV-ED3 loaded biosensors in solutions containing different concentrations of recombinant Human EGFR Protein (ECD, hFc Tag) or (Isoform VIII, hFc Tag) in a two-fold dilution series. The association and dissociation were measured for 400s. The biosensors were regenerated for 3–4 cycles using a 10mM glycine solution, pH 2.0, and then neutralized in the assay buffer. After regeneration, the biosensors were recharged using a 10mM  $\text{NiCl}_2$  solution for 60s. The sensor with 0  $\mu\text{g}/\text{mL}$  recombinant EGFR was used for reference subtraction. The binding data were fitted using a 2:1 (Heterologous binding model) binding model using Octet Data Analysis software to evaluate the equilibrium dissociation constants ( $K_D$ ).

### Statistical analysis and software

GraphPad Prism version 9 was used to perform all the statistical analysis. Statistical analysis was done using paired/unpaired Student's t-test, Kruskal-Wallis test with Dunn's multiple comparisons test or one-way ANOVA followed by Dunnett's/Sidak's multiple comparisons multiple comparison test. Error bar indicates means  $\pm$  SD/SEM. Microscopic image analysis was performed on Image J or Imaris version 9.9.

### Supporting information

**S1 Fig. Kinetics of JEV replication.** SH-SY5Y cells were infected with JEV MOIs 1 and 10 for 1 h and were harvested at 0min, 15min, 30 min, 1 h, 3 h, 6 h, 12 h, and 24 h post-infection. (a) The graph shows relative JEV RNA levels normalized to 0 mpi, MOI 1. (b) Viral titres at 12 and 24 hpi. All values are represented as mean  $\pm$  S.D from at least two independent experiments.  
(TIF)

**S2 Fig. Effect of CLTB knockdown on cargo internalization.** (a-b) SH-SY5Y cells transfected with siNT and siCLTB (72h), were treated low (10, 20, 50ng/ml), and high (180ng/ml) concentration of Alexa fluor 555 EGF along with Alexa fluor 647 Tf (20 ng/ml) for 5min at 37°C. (a) Representative images indicating cargo uptake. Images were acquired using

63x objective, Scale: 20  $\mu$ m. (b) Quantification of cargo uptake with a bar graph representing the total fluorescent intensities from 2 or more independent coverslips (~ 100 cells per coverslip). (c) SH-SY5Y cells seeded in Nu-serum containing media were pre-treated with either DMSO or 80  $\mu$ M of dynasore for 1 h at 37°C. Cells were then given a pulse of Alexa fluor 555 EGF (50 ng/ml) and Alexa fluor 647 Tf (20 ng/well) for 5 min at 37°C. Images show uptake of EGF and Tf upon treatment with DMSO/dynasore. Scale, 20  $\mu$ m. Bar graph compares the effect of dynasore treatment with DMSO control on the fluorescent intensities of EGF and Tf cargo. Total fluorescent intensities were quantified using Image J software with ~100 cells/coverslip. Individual values are representative of mean  $\pm$  S.E.M. Statistical analysis was determined with student's unpaired two-tailed t-test, NEJM: 0.12 (ns), 0.033 (\*), 0.002(\*\*), <0.001(\*\*\*) (TIF)

**S3 Fig. Dynamin colocalizes with JEV capsid structures during entry.** (a) SH-SY5Y cells were allowed to bind with 100 MOI virus on ice for 1 h and were subsequently shifted to 37°C for 10 min, 30 min, and 60 min. Cells were fixed and immunostained for capsid (magenta) and dynamin (green), and then imaged using the Elyra PS1 (Carl Zeiss Super-resolution microscope). Insets show the magnified area from the confocal micrographs depicting the colocalization of dynamin puncta with capsid structures. Images are representative of two independent coverslips. Scale: 10 $\mu$ m, inset: 1 $\mu$ m. (b) The bar graph represents the quantification of the total number of capsid-positive structures and the total number of capsid structures colocalized with dynamin puncta per cell. All values are represented as mean  $\pm$  S.E.M. (TIF)

**S4 Fig. Effect of Endophilin TKD on Tf and EGF uptake.** (a-b) SH-SY5Y cells transfected with siNT and three endophilin A1/A2/A3 siRNA: siTKD (72 h), were treated with Alexa fluor 555 EGF (50 & 180 ng/ml) and Alexa fluor 647 Tf (20 ng/well) for 5 min at 37°C. (a) Representative images indicating cargo uptake. Scale, 20  $\mu$ m. (b) The bar graph quantifies the total fluorescent units of EGF and Tf uptake under siNT and siTKD conditions. Analysis was performed using image J software with ~100 cells/coverslip, represented as mean  $\pm$  S.E.M. Statistical analysis was determined with unpaired student's t-test, NEJM: 0.12 (ns), 0.033 (\*), 0.002(\*\*), <0.001(\*\*\*) (TIF)

**S5 Fig. Endophilin is crucial for JEV entry and localizes with capsid at early time of infection.** (a) SH-SY5Y cells were transfected with all three endophilin A1/A2/A3 siRNA (siTKD) for 72 h. Cells were infected with JEV MOI 5 & 20 at 37°C for 1 h, and virus internalization assays were performed. Absolute virus envelope copies were detected with qRT-PCR. Data shown are from two or more independent experiments represented as mean  $\pm$  S.D. Statistical analysis was determined with Mann Whitney test with 95% confidence level, NEJM: 0.12 (ns), 0.033 (\*), 0.002(\*\*), <0.001(\*\*\*) (TIF)

(b) SH-SY5Y cells were allowed to bind with 100 MOI virus on ice for 1 h and were subsequently shifted to 37°C for 10 min, 30 min, and 60 min. Cells were immunostained for capsid (magenta) and endophilin A2 (green) and imaged on Elyra PS1 (Carl Zeiss Super-resolution microscope). Insets show the magnified area from the confocal micrographs depicting the colocalization of endophilin A2 with capsid structures. Images are representative of two independent experiments. Scale: 10 $\mu$ m, inset: 1 $\mu$ m. (c) The bar graph represents the quantification of the total number of capsid-positive structures and the total number of capsid structures colocalized with endophilin A2 per cell. All values are represented as mean  $\pm$  S.E.M. (TIF)

**S6 Fig. Treatment with CHIR-99021 and serum stimulation upregulates FEME.** (a) SH-SY5Y cells were pre-treated with CHIR-99021 for 1 h at 37°C and then pulsed with Alexa fluor 555 EGF (180 ng/ml) for 5 min at 37°C. Cells were fixed, and images were acquired at a 63x objective Scale, 20  $\mu$ m. Bar graph shows the quantification of the total fluorescent unit of EGF in DMSO and CHIR-99021 treated conditions. (b) Primary cortical neurons were left uninfected, 20% serum-stimulated, treated with EGF (180 ng/ml), or infected with JEV (100 MOI) for 15 min and 30 min respectively at 37°C. Cells

were fixed and stained with endophilin A2, and images were acquired using a 63x objective scale: 10  $\mu$ m. (c) The bar graph quantifies the total fluorescent unit of endophilin-positive puncta in different conditions. Analysis was performed using image J software with ~100 cells/coverslip. All values are represented as mean  $\pm$  S.E.M; statistical analysis was determined with unpaired student's t-test/Kruskal-Wallis test with Dunn's multiple comparisons test. Statistical significance: NEJM: 0.12 (ns), 0.033 (\*), 0.002(\*\*), <0.001(\*\*\*).

(TIF)

**S7 Fig. Generation of SH-SY5Y clones expressing EGFP-tagged truncation domains of Endophilin.** (a) SH-SY5Y cells with stable expression of EGFP-C1 (empty vector), endophilin A full length (FL), truncated endophilin with  $\Delta$ SH<sub>3</sub>,  $\Delta$ H<sub>0</sub>, and  $\Delta$ BAR domains were serum-stimulated (20% FBS), and pulsed with EGF-555 at 50 ng/ml or 180 ng/ml for 5 min at 37°C. For the Tf uptake assay, cells were serum starved for 30 min and were pulsed with 20 ng/well of Tf-568 for 5 min at 37°C. Cells were pulsed with 200  $\mu$ g/ml of TRITC- dextran (10,000 MW) for the fluid phase uptake assay for 10 min at 37°C. Cells were fixed with 4% PFA, and images were acquired with 63x objective. Images are representative of the uptake of fluorescently labelled cargoes. (b-e) The bar graph represents the quantification of total fluorescent intensities. Analysis was performed using image J software from ~100 cells per coverslip. All values are represented as mean  $\pm$  S.E.M; statistical analysis was determined with Ordinary one-way ANOVA with Dunnett's multiple comparison test with 95% confidence level.

(TIF)

**S8 Fig. Cell viability assay with pharmacological inhibitors of actin cytoskeleton.** (a) SH-SY5Y cells were treated with the actin inhibitors LatA (1  $\mu$ M), Jas (1  $\mu$ M), CytoD (5  $\mu$ M), CK-548 (50  $\mu$ M) and Wiskostatin (10  $\mu$ M) for 4 h, and a cell viability assay was performed to establish non-toxic drug concentration. (b-c) Cells were pre-treated with DMSO control/ actin inhibitor for 1 h at 37°C, infected with 1 MOI virus at 37°C for 1 h, and harvested at 24 hpi. Viral RNA was determined by qRT-PCR (b), and the extracellular virus particles were detected with plaque assays (c). Data shown are from two or more independent experiments represented as mean  $\pm$  S.D. Statistical analysis was determined by Ordinary one-way ANOVA with Dunnett's multiple comparison test with 95% confidence level. Statistical significance: NEJM: 0.12 (ns), 0.033 (\*), 0.002(\*\*), <0.001(\*\*\*).

(TIF)

**S9 Fig. Rearrangements in the F-actin organization upon JEV entry.** (a) SH-SY5Y cells were allowed to bind with 100 MOI JEV at 4°C to allow attachment only and were subsequently shifted to 37°C for internalization for 5-, 10-, 15-, 30-, 60- min. Cells were immunostained with JEV envelope antibody (magenta) and phalloidin (cyan) and imaged with Leica TCS SP8 microscope, 63x objective. The representative confocal micrograph shows the phalloidin-stained F-actin and JEV envelope puncta at the respective time points, scale: 10  $\mu$ m. (b) Primary cortical neurons were infected with 100 MOI JEV at 4°C to allow attachment only and were subsequently shifted to 37°C for internalization for 15 min. Cells were fixed and immunostained with JEV envelope antibody (magenta) and phalloidin (cyan), nuclei with dapi (blue). The representative confocal micrograph shows the phalloidin-stained F-actin, envelope and nuclei in cortical neurons, scale: 10  $\mu$ m.

(TIF)

**S10 Fig. Pharmacological inhibition of EGFR decreases JEV uptake.** SH-SY5Y cells were either untreated or treated with genistein, gefitinib (a), or erlotinib (b) in a dose-dependent concentration for 5 h at 37°C. MTT assay was performed to check the percentage of viable cells. Data shown are from two or more independent experiments represented as mean  $\pm$  S.D. (c) Cells were serum starved overnight and treated with genistein (400  $\mu$ g/ml) or gefitinib (400  $\mu$ g/ml) for 5 h before infection. Virus entry assay was performed at 20 MOI, 4°C, for 1 h and then shifted to 37°C for 1 h. Viral RNA was determined by qRT-PCR. All values are represented as mean  $\pm$  S.D from at least two independent experiments. Statistical

analysis was performed using ordinary one-way ANOVA, followed by Dunnett's multiple comparison test with a 95% confidence level. Statistical significance: NEJM: 0.12 (ns), 0.033 (\*), 0.002(\*\*), <0.001(\*\*\*)).

(TIF)

**S11 Fig. EGFR silencing leads to a decrease in EGF uptake.** SH-SY5Y cells transfected with siNT/si EGFR for 72 h, were treated with Alexa fluor 555 EGF (50 & 180 ng/ml) for 5 min at 37°C. (a) Representative images indicating cargo uptake. Scale, 20 µm. (b) Bar graph shows the quantification of the total fluorescent units of EGF uptake. Analysis was performed using image J software with ~100 cells/cover slip, represented as mean ± S.E.M. Statistical analysis was determined with Ordinary one-way ANOVA with Šídák's multiple comparisons test, NEJM: 0.12 (ns), 0.033 (\*), 0.002(\*\*), <0.001(\*\*\*)).

(TIF)

**S12 Fig. Surface EGFR levels are reduced in cells upon dose dependent EGF binding.** SH-SY5Y cells were serum stimulated with 20% FBS for 15 min at 37°C followed by different doses of EGF stimulation (0, 10, 20, 30, 50, 100, 200, and 300 ng/ml) at 37°C for 15 min. Cells were washed with PBS and labelled for cell surface EGFR. (a) Images show cell surface EGFR levels (green). (b) The bar graph shows the quantification of total fluorescent intensities, as measured using ImageJ software with ~100 cells/cover slip; scale: 10 µm. Individual values are represented as the mean ± S.E.M. Statistical analysis was performed using ordinary one-way ANOVA with Dunnett's multiple comparison test at a 95% confidence level. Statistical significance: NEJM: 0.12 (ns), 0.033 (\*), 0.002(\*\*), <0.001(\*\*\*)).

(TIF)

**S13 Fig. EGFR colocalizes with the JEV capsid/envelope during entry.** (a) SH-SY5Y cells were allowed to bind with 100 MOI of virus for 1 h on ice and were fixed post 5- and 10-min internalization at 37°C. Cells were immunostained with JEV capsid (magenta) and EGFR (green) antibodies. Images were acquired in Elyra PS1 (Carl Zeiss Super-resolution microscope) using 63 x objective. Insets show the zoomed image of capsid-positive structures colocalized with EGFR; scale: 10 µm, inset: 1 µm. (b) Primary cortical neurons were incubated with 100 MOI of virus for 1 h on ice and were subsequently fixed post 0-, 10-, 30-, and 60- min of virus internalization. Cells were immunostained with JEV envelope (magenta), and EGFR (green) antibodies. Images were acquired with Elyra PS1 (Carl Zeiss Super-resolution microscope) using 63 x objective; insets show the zoomed image of envelope-positive structures colocalized with EGFR. Representative image with 0 min pi is shown, data for other time points not included here; scale: 10 µm, inset: 1 µm.

(TIF)

**S14 Fig. JEV infection enhances EGF uptake.** SH-SY5Y cells grown on coverslips were transfected with siNT and si CLTB for 72 h. Cells were mock-infected and JEV (MOI 1)-infected for 1 h and were pulsed with two different concentrations of Alexa Fluor 555 EGF (50 & 180 ng/ml) for 5 min at 37 °C. The bar graph quantifies the total fluorescent units of EGF uptake under siNT and siCLTB conditions. Analysis was performed using ImageJ software, represented as mean ± S.E.M. Statistical analysis was determined with unpaired Student's t-test, NEJM: 0.12 (ns), 0.033 (\*), 0.002(\*\*), <0.001(\*\*\*)).

(TIF)

**S1 Table. List of chemical reagents used in the study.**

(PDF)

**S2 Table. Primer details.** (a) List of primer sequences for qRT-PCR. (b) Primer sequences used for cloning.

(PDF)

**S1 Raw Data. Minimal data set.**

(XLSX)



## Acknowledgments

SV acknowledges JC Bose Fellowship (JCB/2021/000015) of Anusandhan National Research Foundation (ANRF), Govt. of India. We thank all Virology lab members for their help and support.

## Author contributions

**Conceptualization:** Puja Sharma, Eira Choudhary, Minu Nain, Ambadas Rode, Vidya Mangala Prasad, Sudhanshu Vrati, Manjula Kalia.

**Data curation:** Puja Sharma, Minu Nain, Ambadas Rode, Vidya Mangala Prasad, Manjula Kalia.

**Formal analysis:** Puja Sharma, Laxmi Mishra, Ambadas Rode, Vidya Mangala Prasad, Manjula Kalia.

**Funding acquisition:** Vidya Mangala Prasad, Manjula Kalia.

**Investigation:** Puja Sharma, Mukesh Tanwar, Eira Choudhary, Nandhini M Sundaram, Divya Ojha, Laxmi Mishra, Minu Nain, Ambadas Rode, Vidya Mangala Prasad, Manjula Kalia.

**Methodology:** Puja Sharma, Mukesh Tanwar, Eira Choudhary, Nandhini M Sundaram, Divya Ojha, Laxmi Mishra, Minu Nain, Ambadas Rode, Vidya Mangala Prasad, Manjula Kalia.

**Project administration:** Ambadas Rode, Manjula Kalia.

**Resources:** Vidya Mangala Prasad, Sudhanshu Vrati, Manjula Kalia.

**Supervision:** Ambadas Rode, Vidya Mangala Prasad, Sudhanshu Vrati, Manjula Kalia.

**Writing – original draft:** Puja Sharma, Ambadas Rode, Manjula Kalia.

**Writing – review & editing:** Puja Sharma, Ambadas Rode, Vidya Mangala Prasad, Sudhanshu Vrati, Manjula Kalia.

## References

1. Kalia M, Jameel S. Virus entry paradigms. *Amino Acids*. 2011;41(5):1147–57. PMID: [19826903](#)
2. Helenius A. Virus entry: looking back and moving forward. *J Mol Biol*. 2018;430(13):1853–62. PMID: [29709571](#)
3. McMahon HT, Boucrot E. Molecular mechanism and physiological functions of clathrin-mediated endocytosis. *Nat Rev Mol Cell Biol*. 2011;12(8):517–33. <https://doi.org/10.1038/nrm3151> PMID: [21779028](#)
4. Briant K, Redlingshöfer L, Brodsky FM. Clathrin's life beyond 40: Connecting biochemistry with physiology and disease. *Curr Opin Cell Biol*. 2020;65:141–9. <https://doi.org/10.1016/j.ceb.2020.06.004> PMID: [32836101](#)
5. Ferreira APA, Boucrot E. Mechanisms of Carrier Formation during Clathrin-Independent Endocytosis. *Trends Cell Biol*. 2018;28(3):188–200. <https://doi.org/10.1016/j.tcb.2017.11.004> PMID: [29241687](#)
6. Renard H-F, Boucrot E. Unconventional endocytic mechanisms. *Curr Opin Cell Biol*. 2021;71:120–9. <https://doi.org/10.1016/j.ceb.2021.03.001> PMID: [33862329](#)
7. Thottacherry JJ, Sathe M, Prabhakara C, Mayor S. Spoiled for Choice: Diverse Endocytic Pathways Function at the Cell Surface. *Annu Rev Cell Dev Biol*. 2019;35(1):55–84. PMID: [31283376](#)
8. Turtle L, Solomon T. Japanese encephalitis - the prospects for new treatments. *Nat Rev Neurol*. 2018;14(5):298–313. <https://doi.org/10.1038/nrneurol.2018.30> PMID: [29697099](#)
9. Sharma KB, Vrati S, Kalia M. Pathobiology of Japanese encephalitis virus infection. *Mol Aspects Med* [Internet]. 2021 Oct 1 [cited 2024 Dec 5];81. Available from: <https://pubmed.ncbi.nlm.nih.gov/34274157/>
10. Nain M, Mukherjee S, Karmakar SP, Paton AW, Paton JC, Abidin MZ. GRP78 is an important host factor for Japanese encephalitis virus entry and replication in mammalian cells. *J Virol*. 2017;91(6). PMID: [28053106](#)
11. Niu J, Jiang Y, Xu H, Zhao C, Zhou G, Chen P. TIM-1 Promotes Japanese Encephalitis Virus Entry and Infection. *Viruses*. 2018;10(11):630. <https://doi.org/10.3390/v10110630>
12. Chien Y-J, Chen W-J, Hsu W-L, Chiou S-S. Bovine lactoferrin inhibits Japanese encephalitis virus by binding to heparan sulfate and receptor for low density lipoprotein. *Virology*. 2008;379(1):143–51. <https://doi.org/10.1016/j.virol.2008.06.017> PMID: [18640695](#)
13. Chiou S, Liu H, Chuang C, Lin C, Chen W. Fitness of Japanese encephalitis virus to Neuro-2a cells is determined by interactions of the viral envelope protein with highly sulfated glycosaminoglycans on the cell surface. *J Med Virol*. 2005;76(4):583–92.

14. Nain M, Abdin MZ, Kalia M, Vrati S. Japanese encephalitis virus invasion of cell: allies and alleys. *Rev Med Virol.* 2016;26(2):129–41. <https://doi.org/10.1002/rmv.1868> PMID: 26695690
15. Liang J-J, Yu C-Y, Liao C-L, Lin Y-L. Vimentin binding is critical for infection by the virulent strain of Japanese encephalitis virus. *Cell Microbiol.* 2011;13(9):1358–70. <https://doi.org/10.1111/j.1462-5822.2011.01624.x> PMID: 21707907
16. Kalia M, Khasa R, Sharma M, Nain M, Vrati S. Japanese encephalitis virus infects neuronal cells through a clathrin-independent endocytic mechanism. *J Virol.* 2013;87(1):148–62. <https://doi.org/10.1128/JVI.01399-12> PMID: 23055570
17. Khasa R, Sharma P, Vaidya A, Vrati S, Kalia M. Proteins involved in actin filament organization are key host factors for Japanese encephalitis virus life-cycle in human neuronal cells. *Microb Pathog.* 2020;149:104565. <https://doi.org/10.1016/j.micpath.2020.104565> PMID: 33059057
18. Zhu YZ, Xu QQ, Wu DG, Ren H, Zhao P, Lao WG, et al. Japanese Encephalitis Virus Enters Rat Neuroblastoma Cells via a pH-Dependent, Dynamin and Caveola-Mediated Endocytosis Pathway. *J Virol.* 2012;86(24):13407–22. PMID: 23015720
19. Xu Q, Cao M, Song H, Chen S, Qian X, Zhao P, et al. Caveolin-1-mediated Japanese encephalitis virus entry requires a two-step regulation of actin reorganization. *Future Microbiol.* 2016;11:1227–48. <https://doi.org/10.2217/fmb-2016-0002> PMID: 26986451
20. Khasa R, Vaidya A, Vrati S, Kalia M. Membrane trafficking RNA interference screen identifies a crucial role of the clathrin endocytic pathway and ARP2/3 complex for Japanese encephalitis virus infection in HeLa cells. *J Gen Virol.* 2019;100(2):176–86. <https://doi.org/10.1099/jgv.0.001182> PMID: 30489239
21. Liu CC, Zhang YN, Li ZY, Hou JX, Zhou J, Kan L. Rab5 and Rab11 are required for clathrin-dependent endocytosis of Japanese encephalitis virus in BHK-21 cells. *J Virol.* 2017;91(19).
22. Yang S, He M, Liu X, Li X, Fan B, Zhao S. Japanese encephalitis virus infects porcine kidney epithelial PK15 cells via clathrin- and cholesterol-dependent endocytosis. *Virol J.* 2013;10:258. <https://doi.org/10.1186/1743-422X-10-258> PMID: 23937769
23. Boucrot E, Ferreira APA, Almeida-Souza L, Debard S, Vallis Y, Howard G, et al. Endophilin marks and controls a clathrin-independent endocytic pathway. *Nature.* 2015;517(7535):460–5. <https://doi.org/10.1038/nature14067> PMID: 25517094
24. Casamento A, Boucrot E. Molecular mechanism of fast endophilin-mediated endocytosis. *Biochemical Journal.* 2020;477(12):2327–45.
25. Carlin CR. Role of EGF Receptor Regulatory Networks in the Host Response to Viral Infections. *Front Cell Infect Microbiol.* 2022;11.
26. Noh SS, Shin HJ. Role of Virus-Induced EGFR Trafficking in Proviral Functions. *Biomolecules.* 2023;13(12):1766. <https://doi.org/10.3390/biom13121766> PMID: 38136637
27. Tanaka T, Zhou Y, Ozawa T, Okizono R, Banba A, Yamamura T, et al. Ligand-activated epidermal growth factor receptor (EGFR) signaling governs endocytic trafficking of unliganded receptor monomers by non-canonical phosphorylation. *J Biol Chem.* 2018;293(7):2288–301. <https://doi.org/10.1074/jbc.M117.811299> PMID: 29255092
28. Sigismund S, Woelk T, Puri C, Maspero E, Tacchetti C, Transidico P, et al. Clathrin-independent endocytosis of ubiquitinated cargos. *Proc Natl Acad Sci U S A.* 2005;102(8):2760–5. <https://doi.org/10.1073/pnas.0409817102> PMID: 15701692
29. Macia E, Ehrlich M, Massol R, Boucrot E, Brunner C, Kirchhausen T. Dynasore, a cell-permeable inhibitor of dynamin. *Dev Cell.* 2006;10(6):839–50. <https://doi.org/10.1016/j.devcel.2006.04.002> PMID: 16740485
30. Kjaerulf O, Brodin L, Jung A. The Structure and Function of Endophilin Proteins. *Cell Biochem Biophys.* 2011;60(3):137–54.
31. Sigismund S, Woelk T, Puri C, Maspero E, Tacchetti C, Transidico P, et al. Clathrin-independent endocytosis of ubiquitinated cargos. *Proc Natl Acad Sci U S A.* 2005;102(8):2760–5. <https://doi.org/10.1073/pnas.0409817102> PMID: 15701692
32. Sigismund S, Argenzio E, Tosoni D, Cavallaro E, Polo S, Di Fiore PP. Clathrin-mediated internalization is essential for sustained EGFR signaling but dispensable for degradation. *Dev Cell.* 2008;15(2):209–19. <https://doi.org/10.1016/j.devcel.2008.06.012> PMID: 18694561
33. Caldieri G, Barbieri E, Nappo G, Raimondi A, Bonora M, Conte A, et al. Reticulon 3-dependent ER-PM contact sites control EGFR nonclathrin endocytosis. *Science.* 2017;356(6338):617–24. <https://doi.org/10.1126/science.aah6152> PMID: 28495747
34. Ferreira APA, Casamento A, Carrillo Roas S, Half EF, Panambalana J, Subramaniam S, et al. Cdk5 and GSK3 $\beta$  inhibit fast endophilin-mediated endocytosis. *Nat Commun.* 2021;12(1):2424. <https://doi.org/10.1038/s41467-021-22603-4> PMID: 33893293
35. Spector I, Shochet NR, Kashman Y, Groweiss A. Latrunculins: novel marine toxins that disrupt microfilament organization in cultured cells. *Science.* 1983;219(4584):493–5. <https://doi.org/10.1126/science.6681676> PMID: 6681676
36. Bubb MR, Senderowicz AM, Sausville EA, Duncan KL, Korn ED. Jasplakinolide, a cytotoxic natural product, induces actin polymerization and competitively inhibits the binding of phalloidin to F-actin. *J Biol Chem.* 1994;269(21):14869–71. [https://doi.org/10.1016/s0021-9258\(17\)36545-6](https://doi.org/10.1016/s0021-9258(17)36545-6) PMID: 8195116
37. Goddette DW, Frieden C. Actin polymerization. The mechanism of action of cytochalasin D. *Journal of Biological Chemistry.* 1986;261(34):15974–80.
38. Shoji K, Ohashi K, Sampei K, Oikawa M, Mizuno K. Cytochalasin D acts as an inhibitor of the actin-cofilin interaction. *Biochem Biophys Res Commun.* 2012;424(1):52–7. <https://doi.org/10.1016/j.bbrc.2012.06.063> PMID: 22728040
39. Guerriero CJ, Weisz OA. N-WASP inhibitor wiskostatin nonselectively perturbs membrane transport by decreasing cellular ATP levels. *Am J Physiol Cell Physiol.* 2007;292(4):C1562–6. <https://doi.org/10.1152/ajpcell.00426.2006> PMID: 17092993

40. Yang L, Xu J, Guo L, Guo T, Zhang L, Feng L. Porcine epidemic diarrhea virus-induced epidermal growth factor receptor activation impairs the antiviral activity of type I interferon. *J Virol.* 2018;92(8).
41. Sabino C, Bender D, Herrlein ML, Hildt E. The epidermal growth factor receptor is a relevant host factor in the early stages of the Zika virus life cycle in vitro. *J Virol.* 2021;95(20).
42. Wang Q, Pan W, Wang S, Pan C, Ning H, Huang S, et al. Protein Tyrosine Phosphatase SHP2 Suppresses Host Innate Immunity against Influenza A Virus by Regulating EGFR-Mediated Signaling. *J Virol.* 2021;95(6).
43. Li S, Schmitz KR, Jeffrey PD, Wiltzius JJW, Kussie P, Ferguson KM. Structural basis for inhibition of the epidermal growth factor receptor by cetuximab. *Cancer Cell.* 2005;7(4):301–11. <https://doi.org/10.1016/j.ccr.2005.03.003> PMID: [15837620](#)
44. Sorkin A. Internalization of the epidermal growth factor receptor: role in signalling. *Biochem Soc Trans.* 2001;29(4):480–4.
45. Luca VC, AbiMansour J, Nelson CA, Fremont DH. Crystal Structure of the Japanese Encephalitis Virus Envelope Protein. *J Virol.* 2012;86(4):2337–46.
46. Thongtan T, Wikan N, Wintachai P, Rattananurungsan C, Srisomsap C, Cheepsunthorn P. Characterization of putative Japanese encephalitis virus receptor molecules on microglial cells. *J Med Virol.* 2012;84(4):615–23.
47. Das S, Ravi V, Desai A. Japanese encephalitis virus interacts with vimentin to facilitate its entry into porcine kidney cell line. *Virus Res.* 2011;160(1–2):404–8. <https://doi.org/10.1016/j.virusres.2011.06.001> PMID: [21798293](#)
48. Das S, Laxminarayana SV, Chandra N, Ravi V, Desai A. Heat shock protein 70 on Neuro2a cells is a putative receptor for Japanese encephalitis virus. *Virology.* 2009;385(1):47–57. <https://doi.org/10.1016/j.virol.2008.10.025> PMID: [19068261](#)
49. Ren J, Ding T, Zhang W, Song J, Ma W. Does Japanese encephalitis virus share the same cellular receptor with other mosquito-borne flaviviruses on the C6/36 mosquito cells?. *Virol J.* 2007;4(1):83.
50. Das S, Chakraborty S, Basu A. Critical role of lipid rafts in virus entry and activation of phosphoinositide 3' kinase/Akt signaling during early stages of Japanese encephalitis virus infection in neural stem/progenitor cells. *J Neurochem.* 2010;115(2):537–49. <https://doi.org/10.1111/j.1471-4159.2010.06951.x> PMID: [20722967](#)
51. Chuang C-K, Yang T-H, Chen T-H, Yang C-F, Chen W-J. Heat shock cognate protein 70 isoform D is required for clathrin-dependent endocytosis of Japanese encephalitis virus in C6/36 cells. *J Gen Virol.* 2015;96(Pt 4):793–803. <https://doi.org/10.1099/jgv.0.000015> PMID: [25502019](#)
52. Chen S-L, Liu Y-G, Zhou Y-T, Zhao P, Ren H, Xiao M, et al. Endophilin-A2-mediated endocytic pathway is critical for enterovirus 71 entry into caco-2 cells. *Emerg Microbes Infect.* 2019;8(1):773–86. <https://doi.org/10.1080/22221751.2019.1618686> PMID: [31132962](#)
53. Wang MQ, Kim W, Gao G, Torrey TA, Morse HC 3rd, De Camilli P, et al. Endophilins interact with Moloney murine leukemia virus Gag and modulate virion production. *J Biol.* 2003;3(1):4. <https://doi.org/10.1186/1475-4924-3-4> PMID: [14659004](#)
54. Lemnitzer F, Raschbichler V, Kolodziejczak D, Israel L, Imhof A, Bailer SM, et al. Mouse cytomegalovirus egress protein pM50 interacts with cellular endophilin-A2. *Cell Microbiol.* 2013;15(2):335–51. <https://doi.org/10.1111/cmi.12080> PMID: [23189961](#)
55. Serfass JM, Takahashi Y, Zhou Z, Kawasawa YI, Liu Y, Tsoakos N, et al. Endophilin B2 facilitates endosome maturation in response to growth factor stimulation, autophagy induction, and influenza A virus infection. *J Biol Chem.* 2017;292(24):10097–111. <https://doi.org/10.1074/jbc.M117.792747> PMID: [28455444](#)
56. Schelhaas M, Ewers H, Rajamäki M-L, Day PM, Schiller JT, Helenius A. Human papillomavirus type 16 entry: retrograde cell surface transport along actin-rich protrusions. *PLoS Pathog.* 2008;4(9):e1000148. <https://doi.org/10.1371/journal.ppat.1000148> PMID: [18773072](#)
57. Li X-M, Xu K, Wang J-Y, Guo J-Y, Wang X-H, Zeng L, et al. The actin cytoskeleton is important for pseudorabies virus infection. *Virology.* 2024;600:110233. <https://doi.org/10.1016/j.virol.2024.110233> PMID: [39255726](#)
58. Baktash Y, Madhav A, Collier KE, Randall G. Single Particle Imaging of Polarized Hepatoma Organoids upon Hepatitis C Virus Infection Reveals an Ordered and Sequential Entry Process. *Cell Host Microbe.* 2018;23(3):382–394.e5. <https://doi.org/10.1016/j.chom.2018.02.005> PMID: [29544098](#)
59. Serrano T, Frémont S, Echard A. Get in and get out: remodeling of the cellular actin cytoskeleton upon HIV-1 infection. *Biol Cell.* 2023;115(4).
60. Cheng Y, Lou J x i u, Liu C c h u n, Liu Y y u n, Chen X n a n, Liang X d o n g. Microfilaments and microtubules alternately coordinate the multistep endosomal trafficking of classical swine fever virus. *J Virol.* 2021;95(10).
61. Jubrail J, Africano-Gomez K, Herit F, Mularski A, Bourdoncle P, Oberg L. Arpin is critical for phagocytosis in macrophages and is targeted by human rhinovirus. *EMBO Reports.* 2020;21(1):e47963. <https://doi.org/10.15252/embr.201947963> PMID: [31721415](#)
62. Ceresa BP, Peterson JL. Cell and molecular biology of epidermal growth factor receptor. *International Review of Cell and Molecular Biology.* 2014;313:145–178. <https://doi.org/10.1016/B978-0-12-800177-6.00005-0>
63. Singh B, Carpenter G, Coffey RJ. EGF receptor ligands: recent advances. *F1000Res.* 2016;5:2270.
64. Byrne PO, Hristova K, Leahy DJ. EGFR forms ligand-independent oligomers that are distinct from the active state. *J Biol Chem.* 2020;295(38):13353–62. <https://doi.org/10.1074/jbc.RA120.012852> PMID: [32727847](#)
65. Tomas A, Futter CE, Eden ER. EGF receptor trafficking: consequences for signaling and cancer. *Trends Cell Biol.* 2014;24(1):26–34. <https://doi.org/10.1016/j.tcb.2013.11.002> PMID: [24295852](#)
66. Watanabe S, Boucrot E. Fast and ultrafast endocytosis. *Curr Opin Cell Biol.* 2017;47:64–71. <https://doi.org/10.1016/j.ceb.2017.02.013> PMID: [28391090](#)

67. Sigismund S, Algisi V, Nappo G, Conte A, Pascolutti R, Cuomo A, et al. Threshold-controlled ubiquitination of the EGFR directs receptor fate. *EMBO J.* 2013;32(15):2140–57. <https://doi.org/10.1038/emboj.2013.149> PMID: [23799367](#)
68. Zhang YG, Chen HW, Zhang HX, Wang K, Su J, Chen YR. EGFR activation impairs antiviral activity of interferon signaling in brain microvascular endothelial cells during Japanese encephalitis virus infection. *Frontiers in Microbiology.* 2022;13:894356. <https://doi.org/10.3389/fmicb.2022.894356>. eCollection 2022. PMID: [35847084](#)
69. Prajapat SK, Mishra L, Khera S, Owusu SD, Ahuja K, Sharma P, et al. Methotrimeprazine is a neuroprotective antiviral in JEV infection via adaptive ER stress and autophagy. *EMBO Mol Med.* 2024;16(1):185–217. PMID: [38177535](#)
